# Supplementary material for: Inhibition of calcium-triggered secretion by hydrocarbon-stapled peptides
Source: PubMed Central journal article supplement (PMC8967716; doi:10.1038/s41586-022-04543-1), 2022-03-23

**Supplementary information**

---

**Inhibition of calcium-triggered secretion by hydrocarbon-stapled peptides**

---

In the format provided by the authors and unedited

## Table of Contents

**Supplementary Figure 1. a,** Annotated dot blots used to obtain the data shown in Fig.4 f-h. **b,** Annotated raw blots used to obtain the data plotted in Extended Data Fig. 8c-d.

**Supplementary Figure 2.** Quality control data for the SP9 peptide provided by Vivitide Inc.

**Supplementary Figure 3.** Quality control data for the TAT-SP9-Cy3 peptide provided by Vivitide Inc.

**Supplementary Figure 4.** Quality control data for the PEN-SP9-Cy3 peptide provided by Vivitide Inc.

**Supplementary Figure 5.** Quality control data for the PEN-P9-Cy3 peptide provided by Vivitide Inc.

**Supplementary Figure 6.** Quality control data for the TAT-P9-Cy3 peptide provided by Vivitide Inc.

**Supplementary Figure 7.** Quality control data for the SP9-Cy3 peptide provided by Vivitide Inc.

**Supplementary Figure 8.** Quality control data for the P0 peptide provided by Vivitide Inc.

**Supplementary Figure 9.** 1D and 2D NMR experiments for SP9.

**Supplementary Table 1.** Data summary table for the mouse airway mucin secretion and mucus occlusion experiments.

**Supplementary Table 2.** Data summary table for the single vesicle fusion experiments.

**Supplementary Table 3.** Donor subject sex, age and smoking status for HAEC experiments.

**Supplementary Video S1.** Video showing rocking views of the end points of five independent 1- $\mu$ sec simulations of SP9 : Syt1-C2B. The corresponding coordinates are available as source data file SP9\_simulations.pdb.

**Supplementary Video S2.** Video showing rocking views of the end points of five independent 1- $\mu$ sec simulations of P9 : Syt1-C2B. The corresponding coordinates are available as source data file P9\_simulations.pdb.

**a Raw blots for figure 4 f-h**

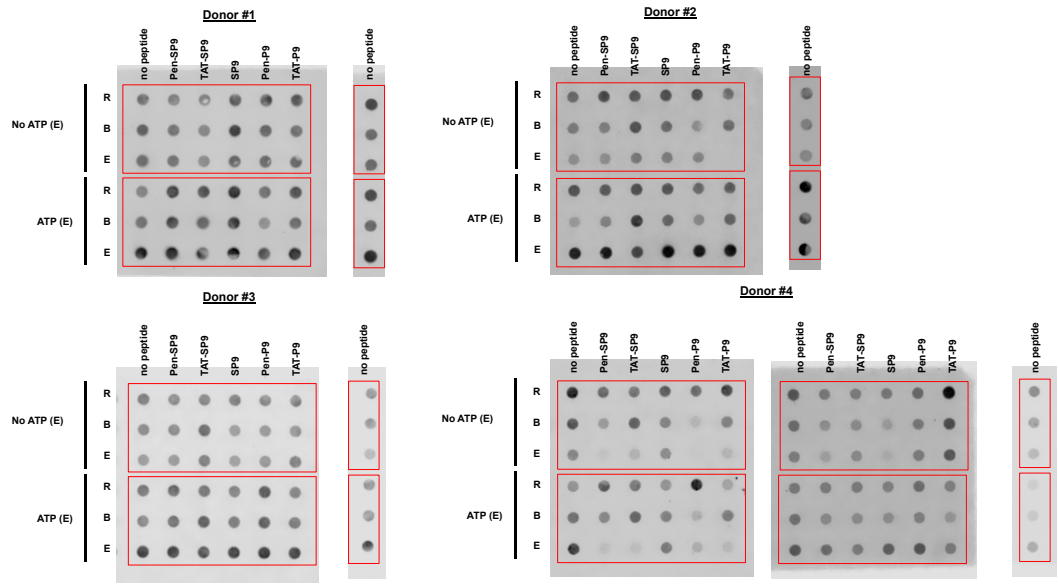

**b Raw blots for Extended Data figure 8 c-d**

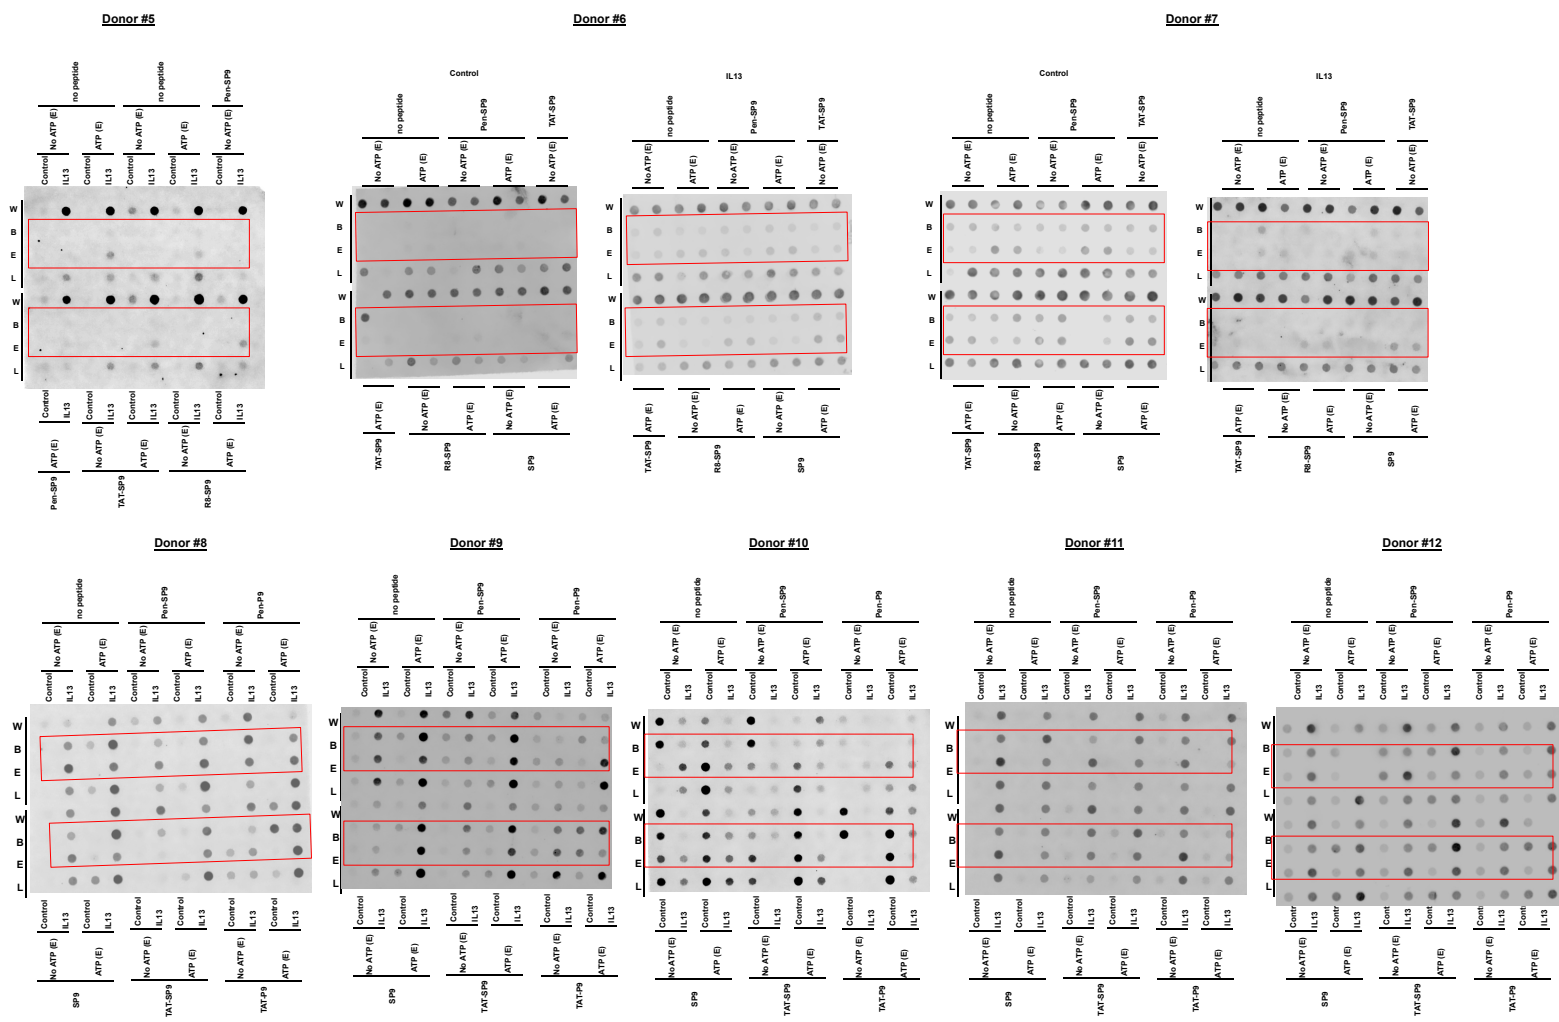



Analysis Name D:\Data\LB6578 89-97\_210010\_P1-B-3\_01\_10382.D  
 Sample Name LB6578 89-97  
 Method APRIL20171.2mLperMIN\_NEPOAHIGH\_10382.m  
 Instrument amaZon SL

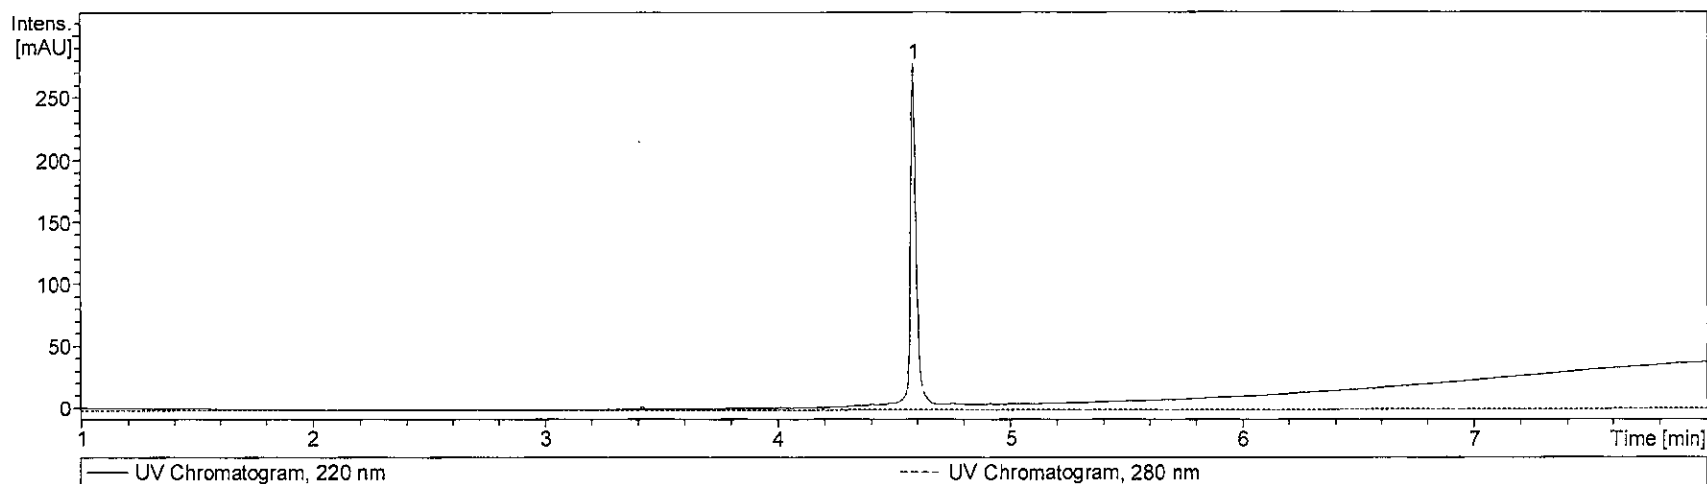

| Target Mass                       | Meas. Mass | Expec. Mass | Delt. Mr [Da] | Intensity | Area | Area Fraction [%] |
|-----------------------------------|------------|-------------|---------------|-----------|------|-------------------|
| Cmpd 1; 4.58 min; Pep Mr: 2221.41 | 2221.41    | 2222.00     | -0.59         | 276       | 469  | 100.0             |

| # | RT [min] | Area   | Area Frac. % |
|---|----------|--------|--------------|
| 1 | 4.58     | 468.51 | 100.00       |

Cmpd 1; 4.58 min; Pep Mr: 2221.41

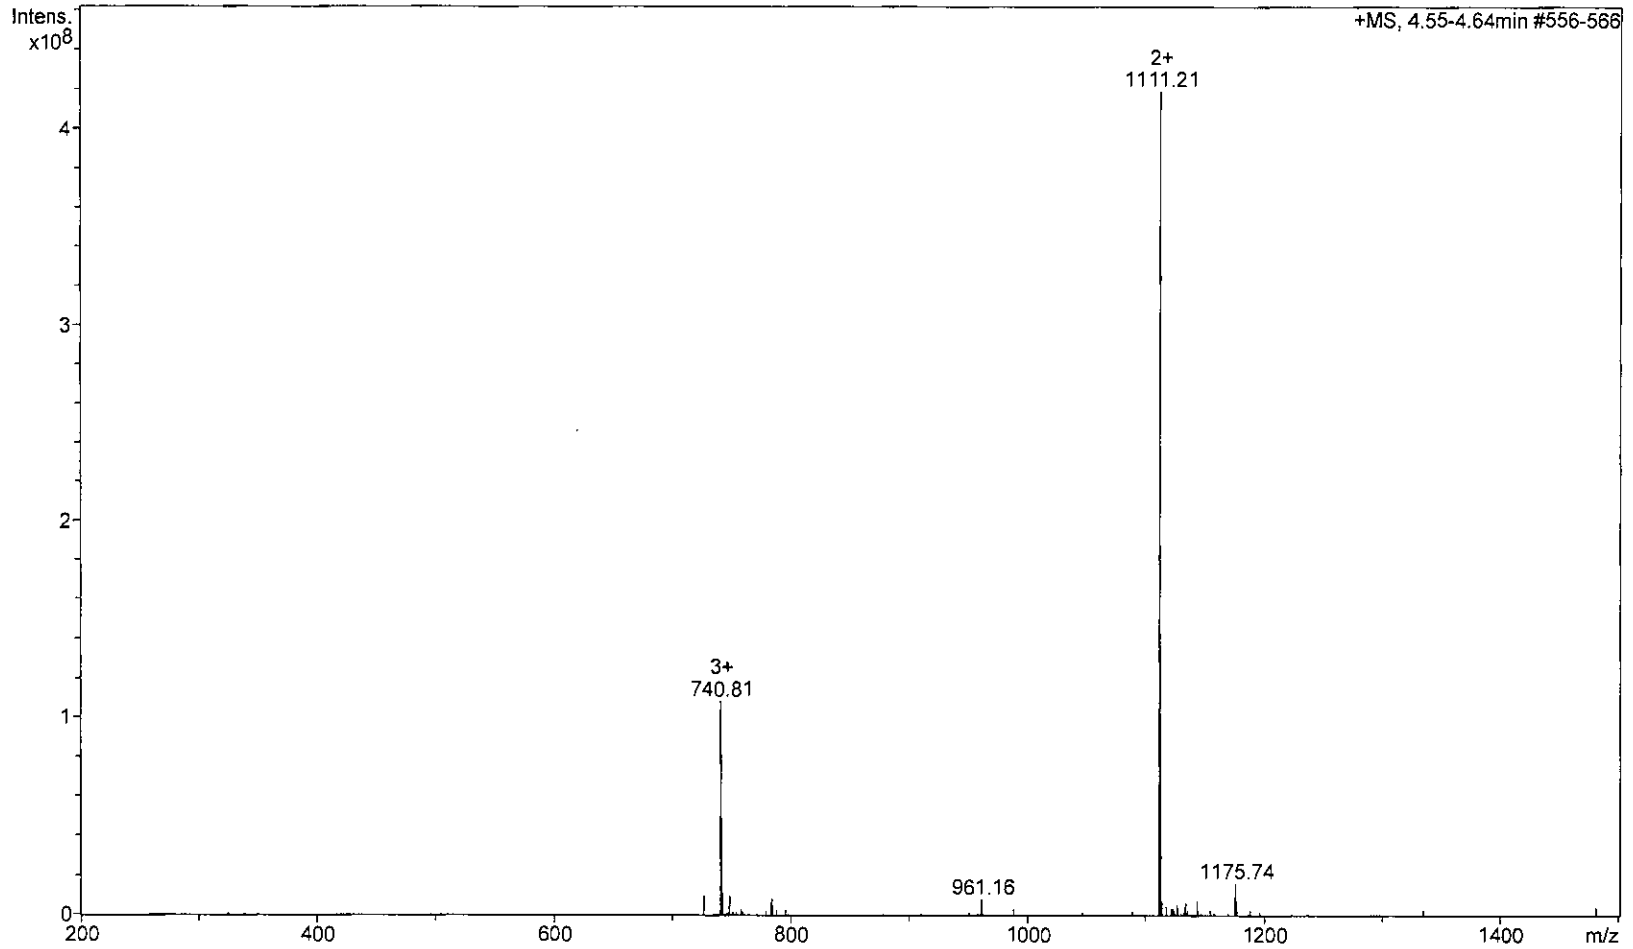

## Certificate of Analysis

|                                                                                                         |                          |                      |
|---------------------------------------------------------------------------------------------------------|--------------------------|----------------------|
| <b>Sequence:</b> [Stp(16,20)][Stp(23,27)]H2N-GRKKRRQRRRPPQEE(S5)KDA(S5)IR(S5)LVM(S5)DEQ(C/Cy3Mal)-amide |                          |                      |
| <b>Peptide Name:</b> TAT-SP9-CY3                                                                        | <b>Date:</b> May 8, 2020 |                      |
| <b>Order#:</b> P626925                                                                                  | <b>Lot#:</b> BU01353-3   | <b>Amount:</b> 5.1mg |

**Quality Control Specifications:**

| QC Test                                       | QC Specifications                                                                 | Results     |
|-----------------------------------------------|-----------------------------------------------------------------------------------|-------------|
| Purity by HPLC                                | >95% by percent area                                                              | <b>Pass</b> |
| Mass Identification by Mass Spectral Analysis | Calculated Mass within 0.1% of Molecular Weight: <b>4461.0</b>                    | <b>Pass</b> |
| Concentration/Net Peptide                     | Amino Acid Analysis (AAA) determining original concentration/net peptide content. | N/A         |

**Product:** Research Grade Custom Peptide containing traces of Trifluoroacetate (TFA) salts.

**Formulation:**

Final concentration: N/A

Final form: Dry

**Stability and Conditions:** Refer to the Quality Control Detail Information on our website at [www.newenglandpeptide.com/support/quality-control-information](http://www.newenglandpeptide.com/support/quality-control-information). As always, NEP has individual batch records stored electronically for each peptide that includes traceable lot numbers of raw materials used during synthesis. Should you require this information, email [sales@newenglandpeptide.com](mailto:sales@newenglandpeptide.com) with your peptide lot number.

**Notes (if applicable):** Peptide is light sensitive. A cis-trans isomerization of the Pro-Pro bond can occur causing a shoulder, wide peak, or split peak on the HPLC trace.

Approval/Initials

*CP*

*For Science...From Science.*

Analysis Name D:\Data\BU01353\_267370\_P1-C-4\_01\_141129.D  
 Sample Name BU01353  
 Method APRIL20171.2mLperMIN\_NEPOAHIGH\_141129.m  
 Instrument amaZon SL

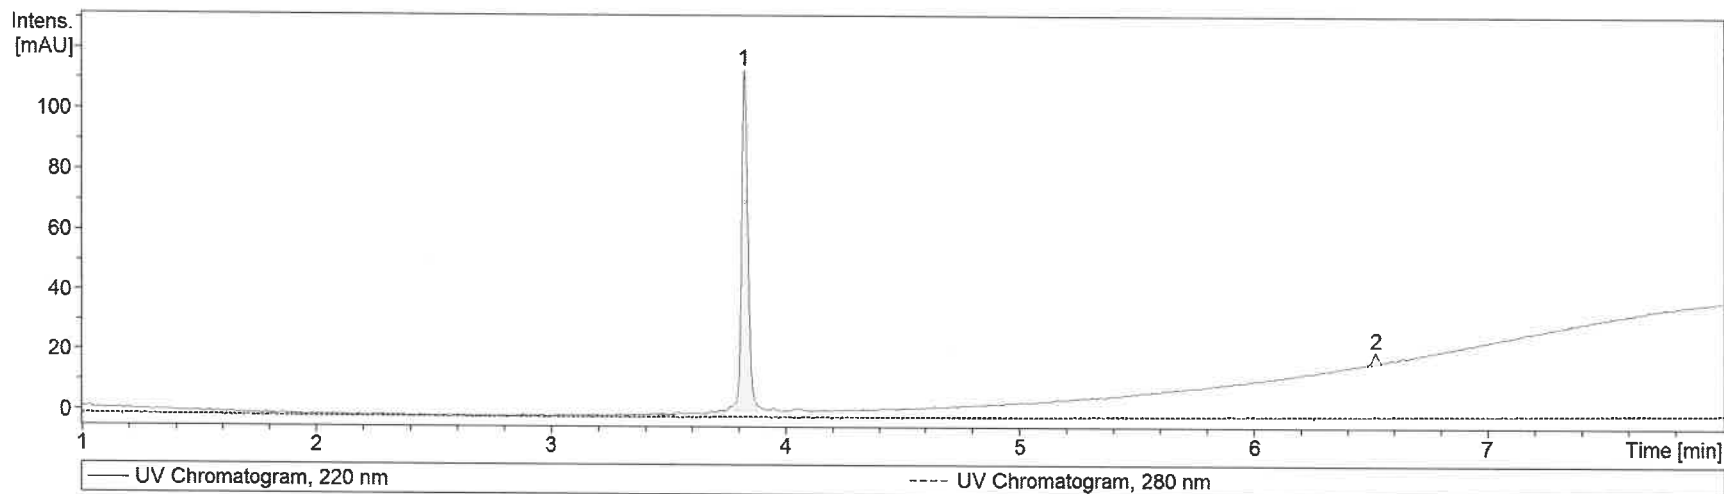

| Target Mass                       | Meas. Mass | Expec. Mass | Delt. Mr [Da] | Intensity | Area | Area Fraction [%] |
|-----------------------------------|------------|-------------|---------------|-----------|------|-------------------|
| Cmpd 1; 3.82 min; Pep Mr: 3879.80 | 3879.80    | 3879.30     | 0.50          | 113       | 209  | 97.3              |

| # | RT [min] | Area     | Area Frac. % |
|---|----------|----------|--------------|
| 1 | 3.82     | 209.1621 | 97.32        |
| 2 | 6.52     | 5.7706   | 2.68         |



Sample ID: BU01353

Molecular Weight: 3879.3

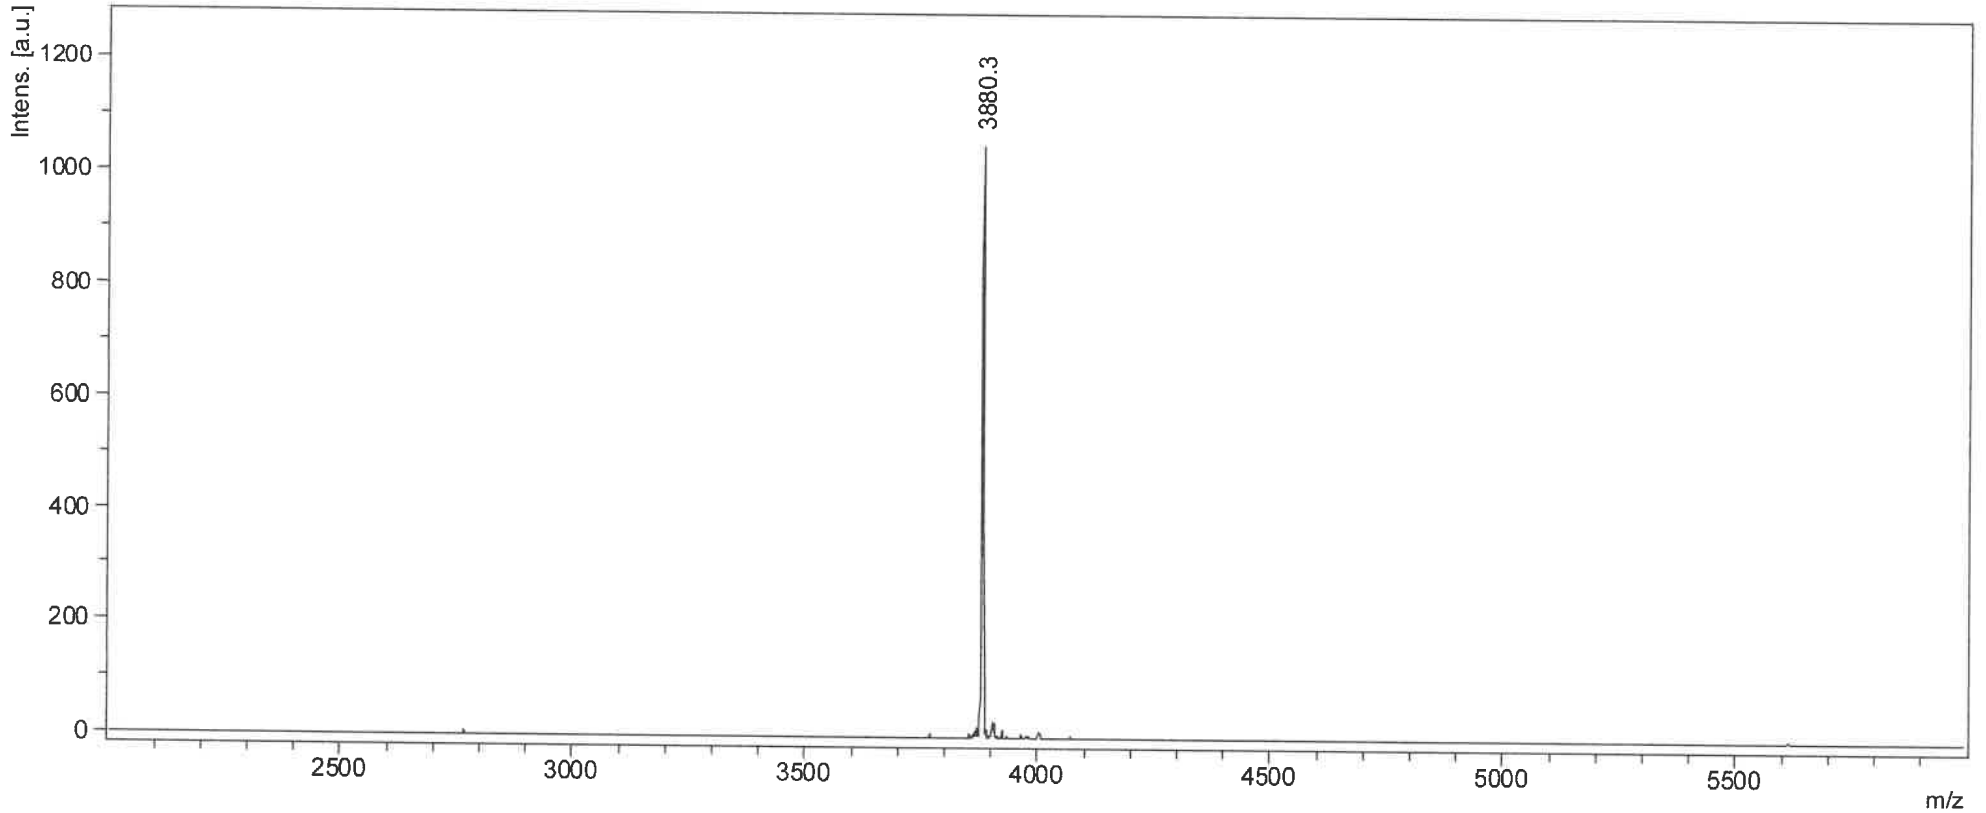

### Certificate of Analysis

|                                                                                                            |                             |                      |
|------------------------------------------------------------------------------------------------------------|-----------------------------|----------------------|
| <b>Sequence:</b> [Stp(19,23)][Stp(26,30)]H2N-RQIKIWFQNRRMKWKKEE(S5)KDA(S5)IR(S5)LVM(S5)DEQ(C/Cy3Mal)-amide |                             |                      |
| <b>Peptide Name:</b> PEN - SEQ - CY3                                                                       | <b>Date:</b> August 3, 2020 |                      |
| <b>Order#:</b> P627037                                                                                     | <b>Lot#:</b> BU06012        | <b>Amount:</b> 5.4mg |

**Quality Control Specifications:**

| QC Test                                       | QC Specifications                                                                 | Results     |
|-----------------------------------------------|-----------------------------------------------------------------------------------|-------------|
| Purity by HPLC                                | >90% by percent area                                                              | <b>Pass</b> |
| Mass Identification by Mass Spectral Analysis | Calculated Mass within 0.1% of Molecular Weight: 4986.1                           | <b>Pass</b> |
| Concentration/ Net Peptide                    | Amino Acid Analysis (AAA) determining original concentration/net peptide content. | <b>N/A</b>  |

**Product:** Research Grade Custom Peptide containing traces of Trifluoroacetate (TFA) salts.

**Formulation:**

Final concentration: N/A

Final form: Dry

**Stability and Conditions:** Refer to the Quality Control Detail Information on our website at [www.newenglandpeptide.com/support/quality-control-information](http://www.newenglandpeptide.com/support/quality-control-information). As always, NEP has individual batch records stored electronically for each peptide that includes traceable lot numbers of raw materials used during synthesis. Should you require this information, email [sales@newenglandpeptide.com](mailto:sales@newenglandpeptide.com) with your peptide lot number.

**Notes (if applicable):** Peptide is light sensitive.

*BAS*

Approval/Initials

*For Science...From Science.*

Analysis Name      D:\Data\BU06012 32-52\_301767\_P1-E-3\_01\_52123.d  
 Sample Name        BU06012 32-52  
 Method              APRIL20171.2mLperMIN\_NEPOAHIGH\_52123.m  
 Instrument          amaZon SL

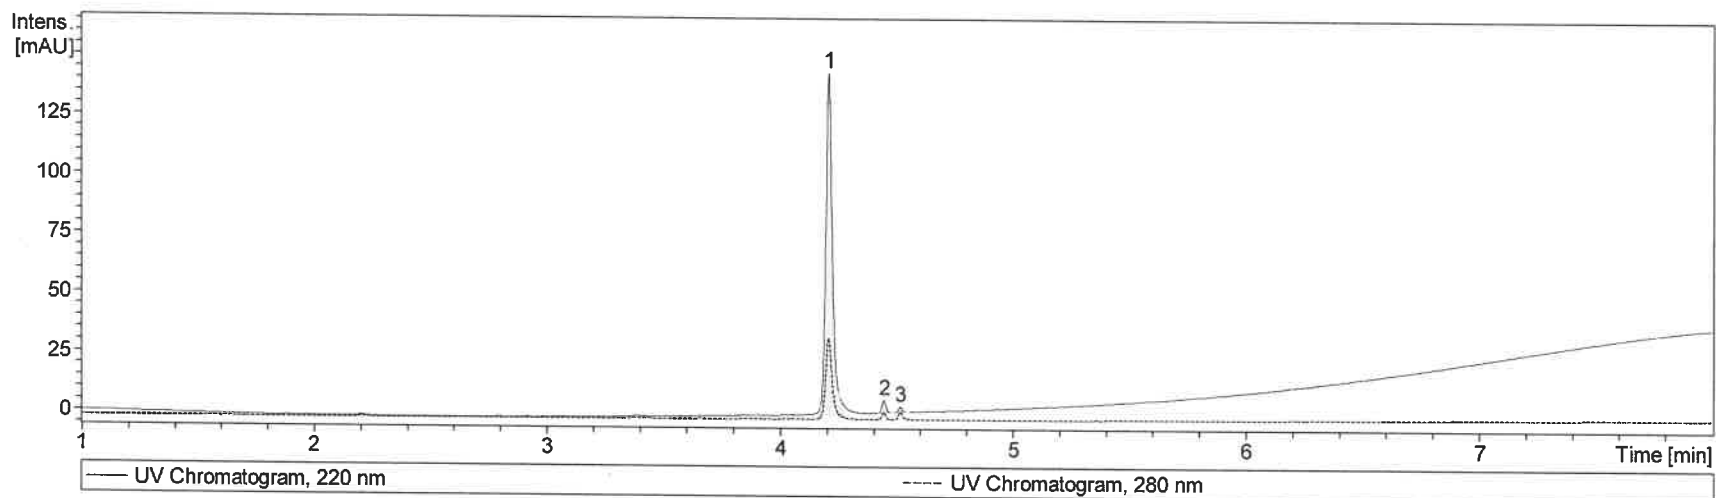

| Target Mass                       | Meas. Mass | Expec. Mass | Delt. Mr [Da] | Intensity | Area | Area Fraction [%] |
|-----------------------------------|------------|-------------|---------------|-----------|------|-------------------|
| Cmpd 1; 4.21 min; Pep Mr: 4986.18 | 4986.18    | 4986.10     | 0.08          | 143       | 280  | 96.7              |

| # | RT [min] | Area     | Area Frac. % |
|---|----------|----------|--------------|
| 1 | 4.21     | 280.3262 | 96.69        |
| 2 | 4.45     | 6.6779   | 2.30         |
| 3 | 4.51     | 2.9193   | 1.01         |

Cmpd 1; 4.21 min; Pep Mr: 4986.18

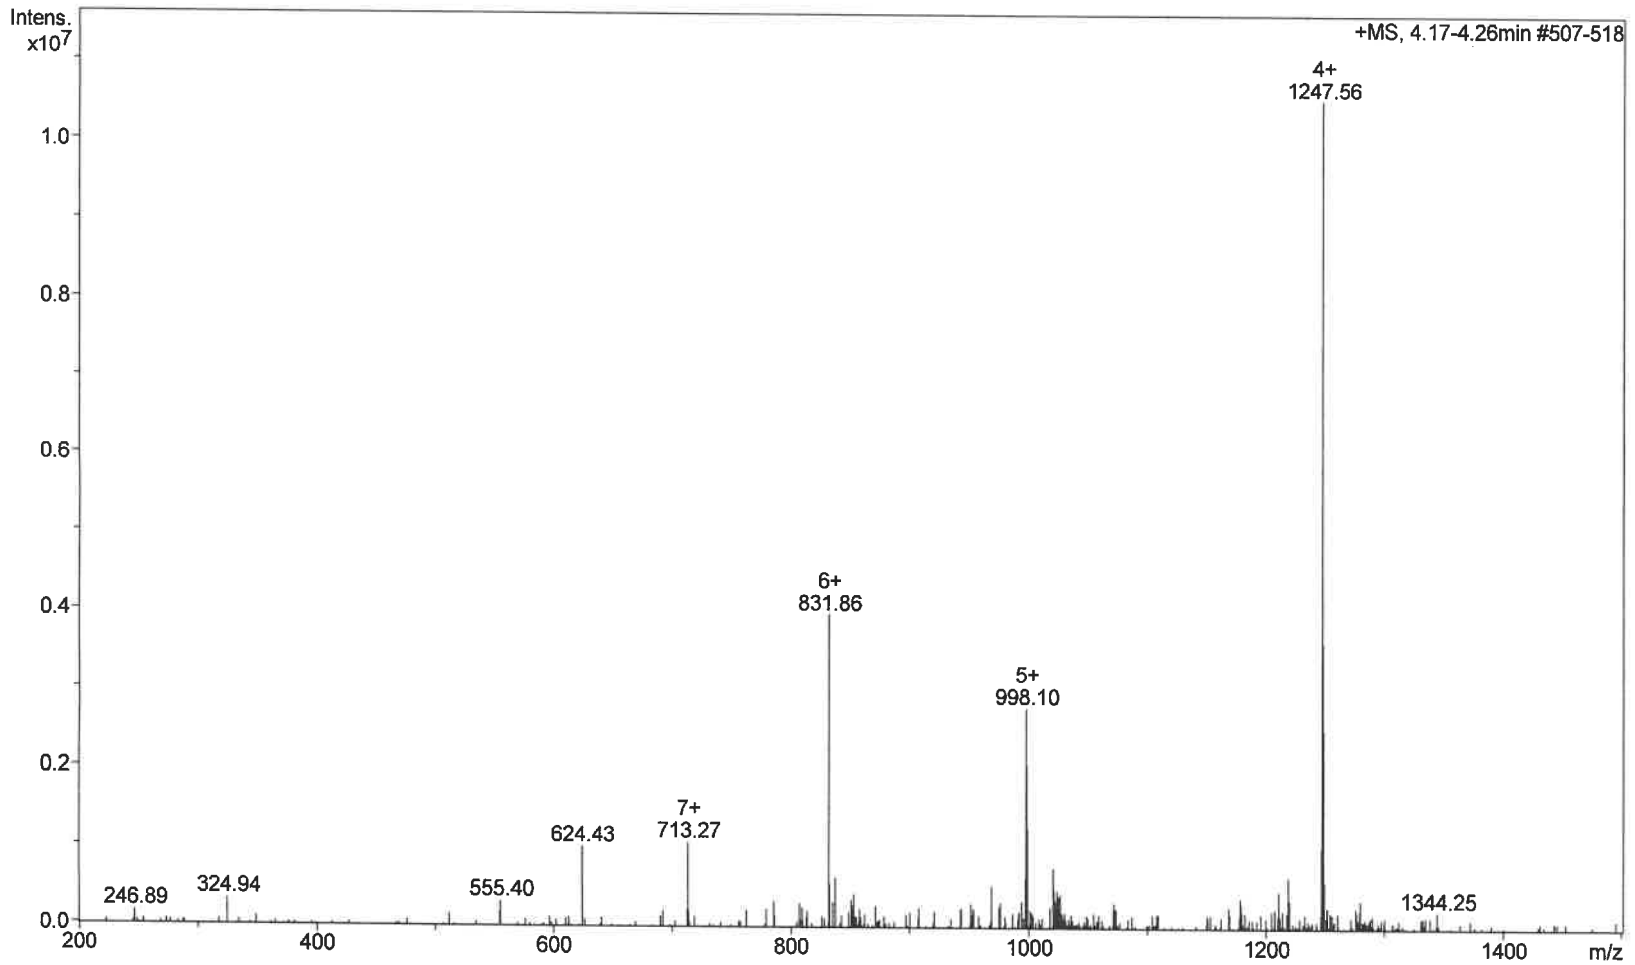

## Certificate of Analysis

|                                                                        |                      |                               |
|------------------------------------------------------------------------|----------------------|-------------------------------|
| <b>Sequence:</b> H2N-RQIKIWFQNRRMKWKKEESKDAGIRTLVMLDEQ(C/Cy3Mal)-amide |                      |                               |
| <b>Peptide Name:</b> Penetratin-P9-Cy3                                 |                      | <b>Date:</b> February 1, 2021 |
| <b>Order#:</b> P629945                                                 | <b>Lot#:</b> BU08265 | <b>Amount:</b> 5.2mg          |

**Quality Control Specifications:**

| QC Test                                       | QC Specifications                                                                 | Results     |
|-----------------------------------------------|-----------------------------------------------------------------------------------|-------------|
| Purity by HPLC                                | >90% by percent area                                                              | <b>Pass</b> |
| Mass Identification by Mass Spectral Analysis | Calculated Mass within 0.1% of Molecular Weight: <b>4844.8</b>                    | <b>Pass</b> |
| Concentration/<br>Net Peptide                 | Amino Acid Analysis (AAA) determining original concentration/net peptide content. | <b>N/A</b>  |

**Product:** Research Grade Custom Peptide containing traces of Trifluoroacetate (TFA) salts.

**Formulation:**

Final concentration: N/A

Final form: Dry

**Stability and Conditions:** Refer to the Quality Control Detail Information on our website at [www.newenglandpeptide.com/support/quality-control-information](http://www.newenglandpeptide.com/support/quality-control-information). As always, NEP has individual batch records stored electronically for each peptide that includes traceable lot numbers of raw materials used during synthesis. Should you require this information, email [sales@newenglandpeptide.com](mailto:sales@newenglandpeptide.com) with your peptide lot number.

**Notes (if applicable):** Peptide is light sensitive.

UR

\_\_\_\_\_  
Approval/Initials

*For Science...From Science.*

New England Peptide Inc., 65 Zub Lane, Gardner, MA 01440 ■ Phone 888-343-5974 ■ Fax 978-630-0021

[www.NewEnglandPeptide.com](http://www.NewEnglandPeptide.com)

Analysis Name D:\Data\NEP\BU08265 8-23\_P1-C-9\_1\_2319.d  
 Sample Name BU08265 8-23  
 Method NEPLC\_HIGH\_2319.m  
 Instrument amaZon SL 3

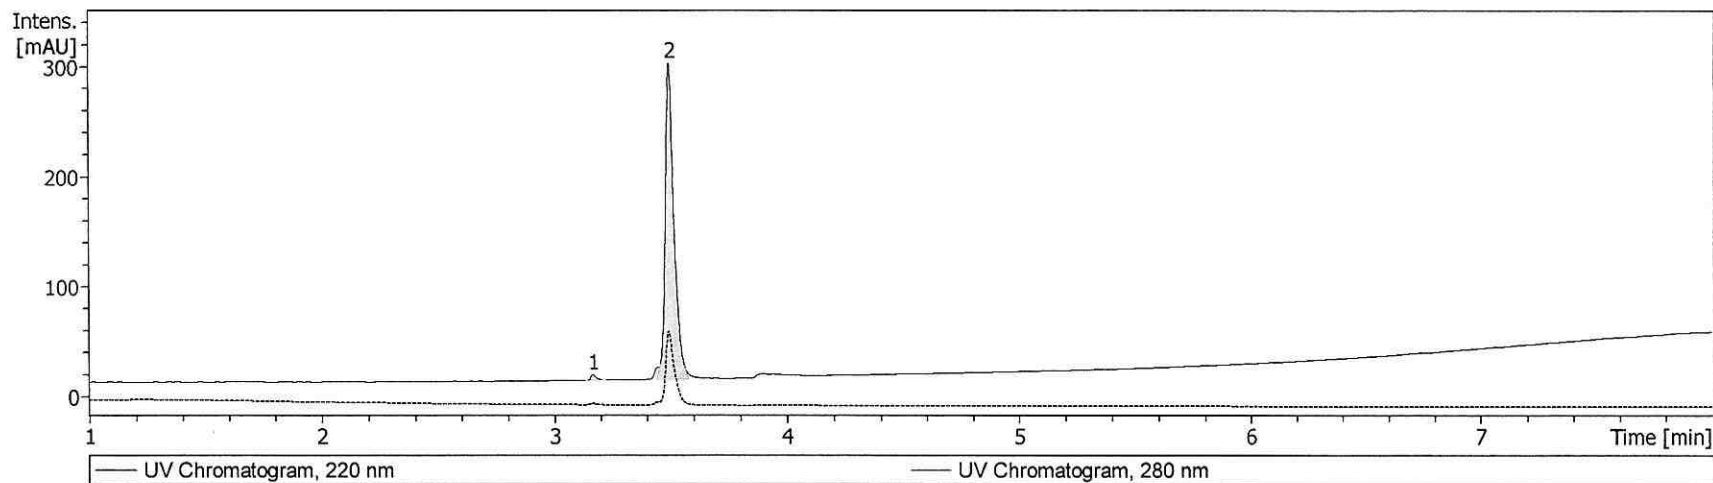

| Target Mass                       | Meas. Mass | Expec. Mass | Delt. Mr [Da] | Intensity | Area | Area Fraction [%] |
|-----------------------------------|------------|-------------|---------------|-----------|------|-------------------|
| Cmpd 2; 3.49 min; Pep Mr: 4844.63 | 4844.63    | 4844.80     | -0.17         | 303       | 742  | 98.7              |

| # | RT [min] | Area     | Area Frac. % |
|---|----------|----------|--------------|
| 1 | 3.17     | 9.8363   | 1.31         |
| 2 | 3.49     | 742.3948 | 98.69        |

Cmpd 2; 3.49 min; Pep Mr: 4844.63

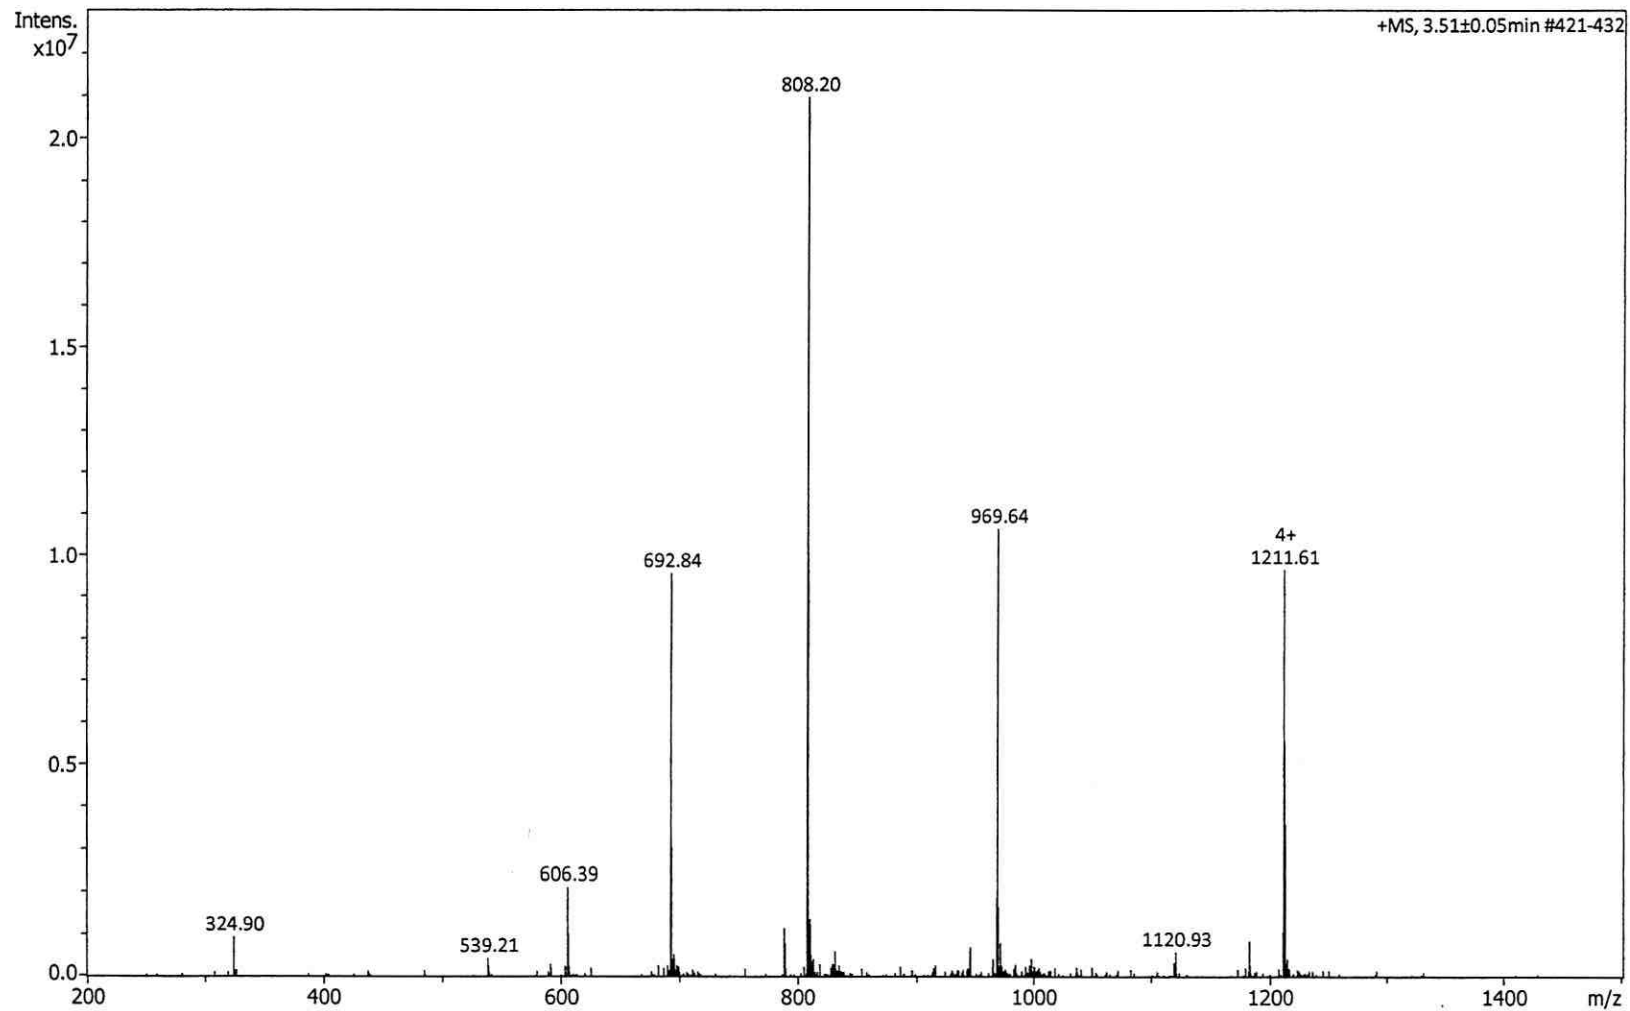

### Certificate of Analysis

|                                                                    |                              |                      |
|--------------------------------------------------------------------|------------------------------|----------------------|
| <b>Sequence:</b> H2N-GRKKRRQRRRPPQEESKDGIRTLVMLDEQ(C/Cy3Mal)-amide |                              |                      |
| <b>Peptide Name:</b> TAT-P9-Cy3                                    | <b>Date:</b> October 8, 2019 |                      |
| <b>Order#:</b> P623777                                             | <b>Lot#:</b> BU01237         | <b>Amount:</b> 2.4mg |

**Quality Control Specifications:**

| QC Test                                       | QC Specifications                                                                 | Results     |
|-----------------------------------------------|-----------------------------------------------------------------------------------|-------------|
| Purity by HPLC                                | >95% by percent area                                                              | <b>Pass</b> |
| Mass Identification by Mass Spectral Analysis | Calculated Mass within 0.1% of Molecular Weight: 4316                             | <b>Pass</b> |
| Concentration/ Net Peptide                    | Amino Acid Analysis (AAA) determining original concentration/net peptide content. | <b>N/A</b>  |

**Product:** Research Grade Custom Peptide containing traces of Trifluoroacetate (TFA) salts.

**Formulation:**

Final concentration: N/A

Final form: Dry

**Stability and Conditions:** Refer to the Quality Control Detail Information on our website at [www.newenglandpeptide.com/support/quality-control-information](http://www.newenglandpeptide.com/support/quality-control-information). As always, NEP has individual batch records stored electronically for each peptide that includes traceable lot numbers of raw materials used during synthesis. Should you require this information, email [sales@newenglandpeptide.com](mailto:sales@newenglandpeptide.com) with your peptide lot number.

**Notes (if applicable):** A cis-trans isomerization of the Pro-Pro bond can occur causing a shoulder, wide peak, or split peak on the HPLC trace. Peptide is light sensitive.

  
 \_\_\_\_\_  
**Approval/Initials**

*For Science...From Science.*

New England Peptide Inc., 65 Zub Lane, Gardner, MA 01440 ■ **Phone** 888-343-5974 ■ **Fax** 978-630-0021

[www.NewEnglandPeptide.com](http://www.NewEnglandPeptide.com)



**Peptide QC Report BU01237 29-40**

Analysis Name D:\Data\BU01238 29-40\_251905\_P2-A-7\_01\_30537.d  
 Sample Name BU01237 29-40  
 Method APRIL20171.2mLperMIN\_NEPO  
 A\_30537.m  
 Instrument UPLC1

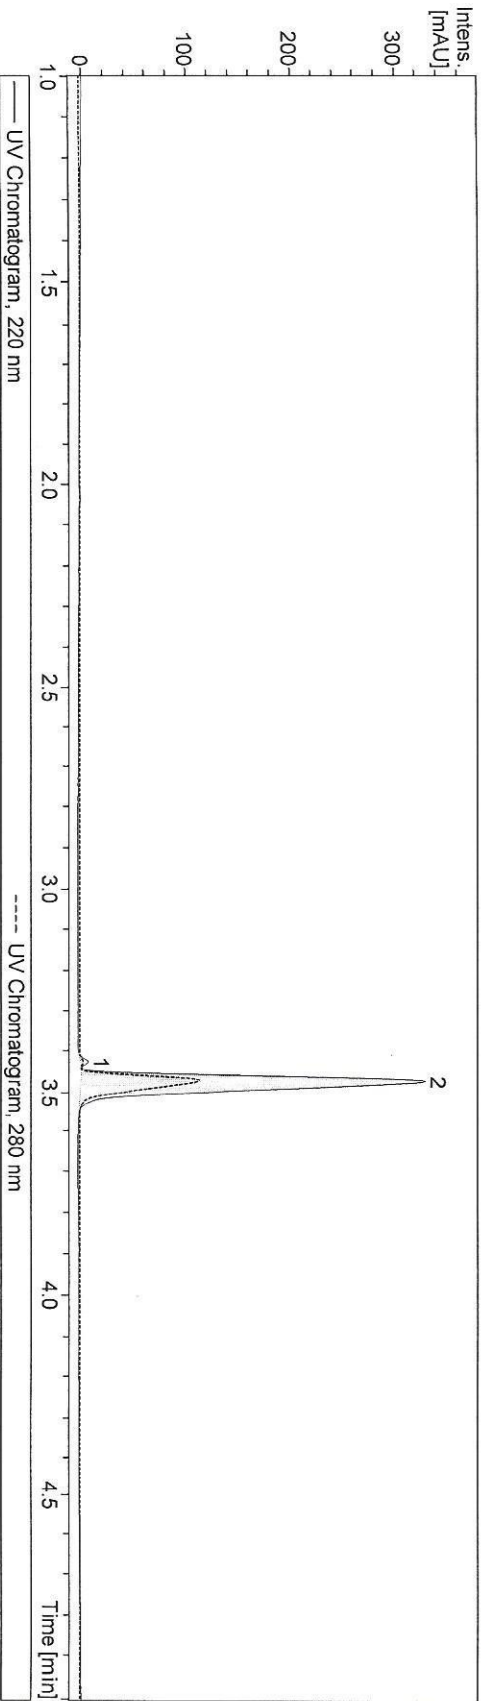

| Compd | RT [min] | Target Mass | Meas. Mass | Expct. Mass | Delt. Mr [Da] | Intensity | Area | Area Fraction [%] |
|-------|----------|-------------|------------|-------------|---------------|-----------|------|-------------------|
| 2     | 3.47     | 4316.06     | 4316.06    | 4316.00     | 0.06          | 328       | 705  | 98.9              |

| # | RT [min] | Area     | Area Frac. % |
|---|----------|----------|--------------|
| 1 | 3.43     | 7.5006   | 1.05         |
| 2 | 3.47     | 704.6333 | 98.95        |

# Peptide QC Report BU01237 29-40

Cmpd 2: 3.47 min; Pep Mr: 4316.06

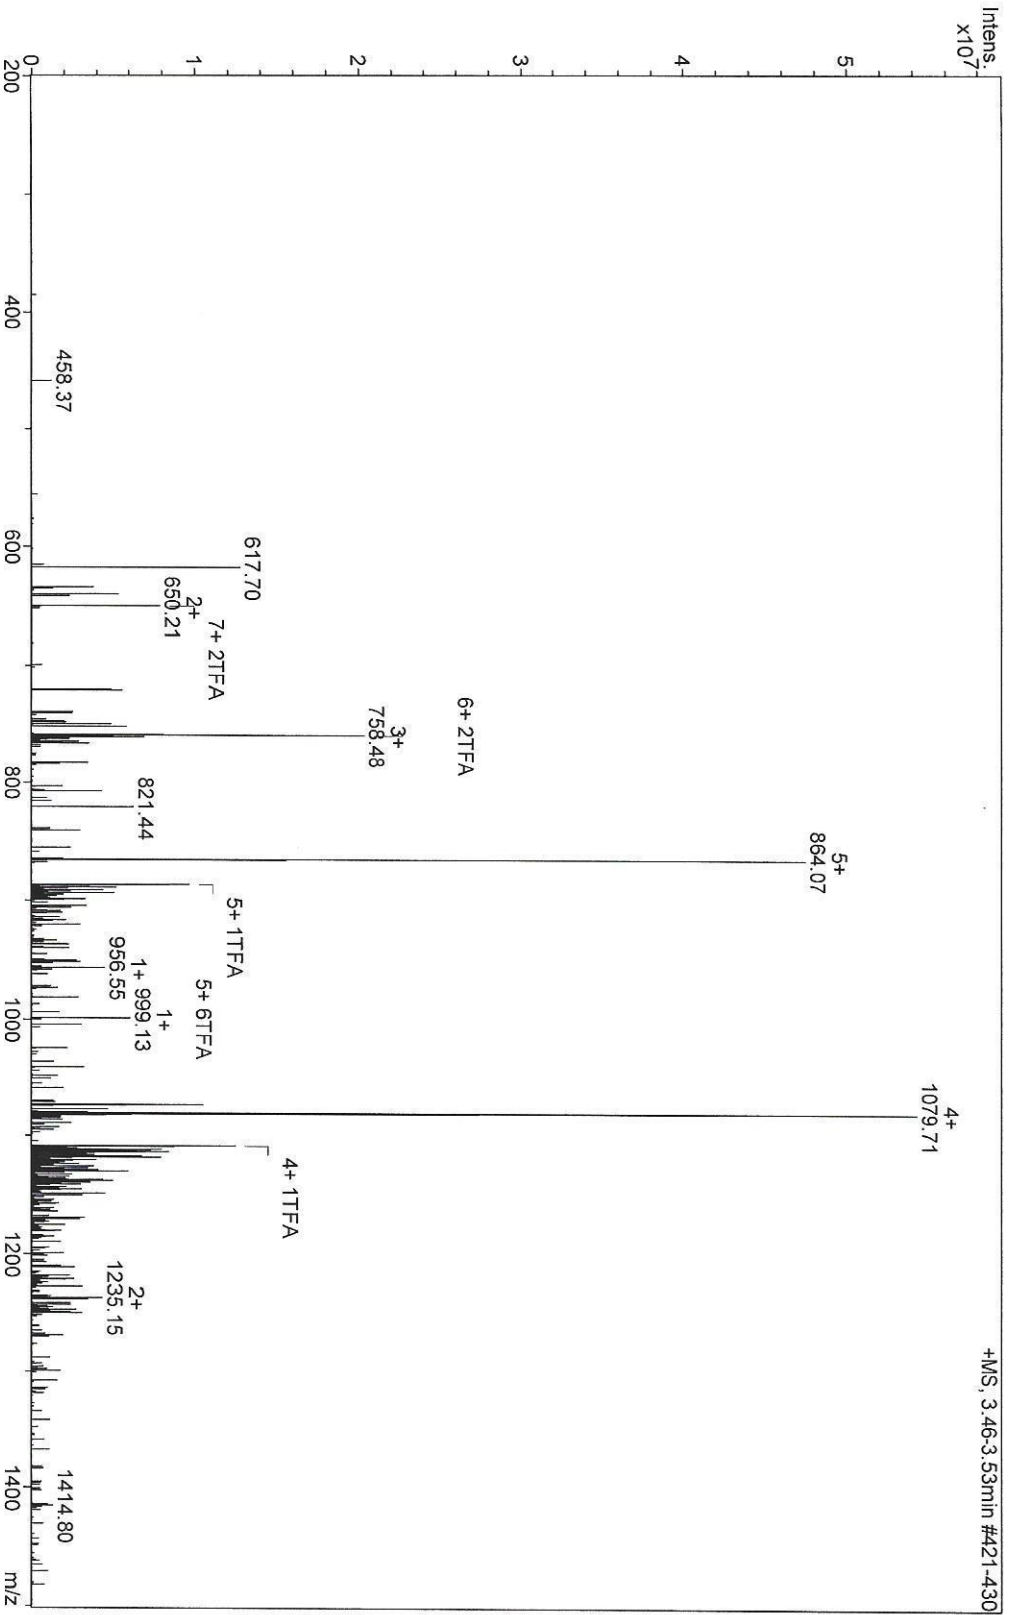

# vivitide

Science for life

## Certificate of Analysis

|                                                                                         |                                                 |                      |
|-----------------------------------------------------------------------------------------|-------------------------------------------------|----------------------|
| <b>Sequence:</b> [Stp(3,7)][Stp(10,14)]Ac-EE(S5)KDA(S5)IR(S5)LVM(S5)DEQ(C/Cy3Mal)-amide |                                                 |                      |
| <b>Peptide Name:</b>                                                                    | <b>Date of Manufacture:</b><br>October 21, 2021 |                      |
| <b>Order #:</b> P634650                                                                 | <b>Lot#:</b> BU11780-2                          | <b>Amount:</b> 1.5mg |

### Quality Control Specifications:

| QC Test                                       | QC Specifications                                                                 | Results                |
|-----------------------------------------------|-----------------------------------------------------------------------------------|------------------------|
| Purity by HPLC                                | >95% by percent area                                                              | <b>Pass</b>            |
| Mass Identification by Mass Spectral Analysis | Calculated Mass within +/-1 Da of average Molecular Weight:<br><b>2800.0</b>      | <b>Pass</b>            |
| Concentration / Net Peptide Content           | Amino Acid Analysis (AAA) determining original concentration/net peptide content. | <b>N/A</b>             |
| Salt Form                                     |                                                                                   | Trifluoroacetate (TFA) |

**Product:** Research Grade Custom Peptide.

### Formulation:

Final concentration: N/A

Final form: Dry

**Stability and Conditions:** Refer to the Quality Control Detail Information on our website at <https://vivitide.com/pages/quality-control>. As always, vivitide has individual batch records stored electronically for each peptide that includes traceable lot numbers of raw materials used during production. Should you require this information, email [sales@vivitide.com](mailto:sales@vivitide.com) with your peptide lot number.

### Notes (if applicable):

Peptide is light sensitive.

BAS

Approved by:

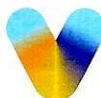

Analysis Name D:\Data\NEP\BU11780-211-15\_P1-B-8\_1\_17663.d  
 Sample Name BU11780-2 11-15  
 Method NEPLC\_HIGH\_17663.m  
 Instrument amaZon SL 3

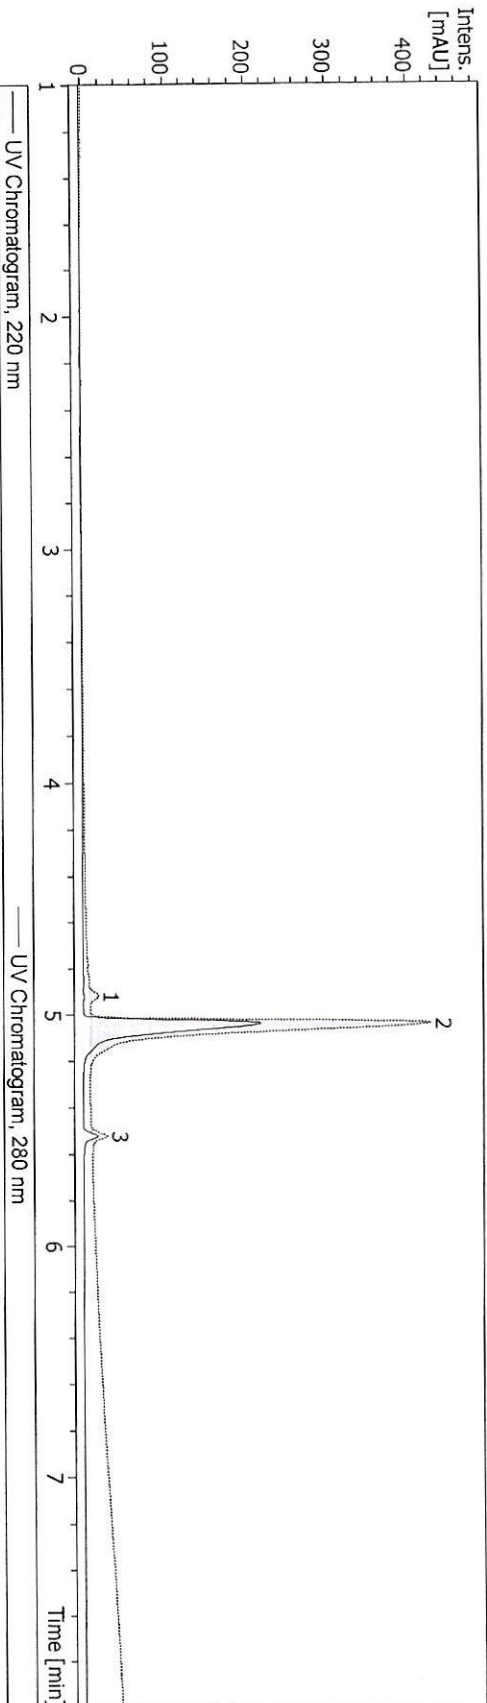

| # | RT [min] | Area     | Area Frac. % | Target Mass | Meas. Mass | Expec. Mass | Delt. Mr [Da] | Intensity | Area | Area Fraction [%] |
|---|----------|----------|--------------|-------------|------------|-------------|---------------|-----------|------|-------------------|
| 1 | 4.92     | 24,923   | 1.61         | 2799.67     | 2799.67    | 2800.00     | -0.33         | 425       | 1481 | 95.9              |
| 2 | 5.04     | 1480,994 | 95.87        |             |            |             |               |           |      |                   |
| 3 | 5.52     | 38,936   | 2.52         |             |            |             |               |           |      |                   |

Cmpd 2: 5.04 min; Pep Mr: 2799.67

Intens.  
x10<sup>8</sup>

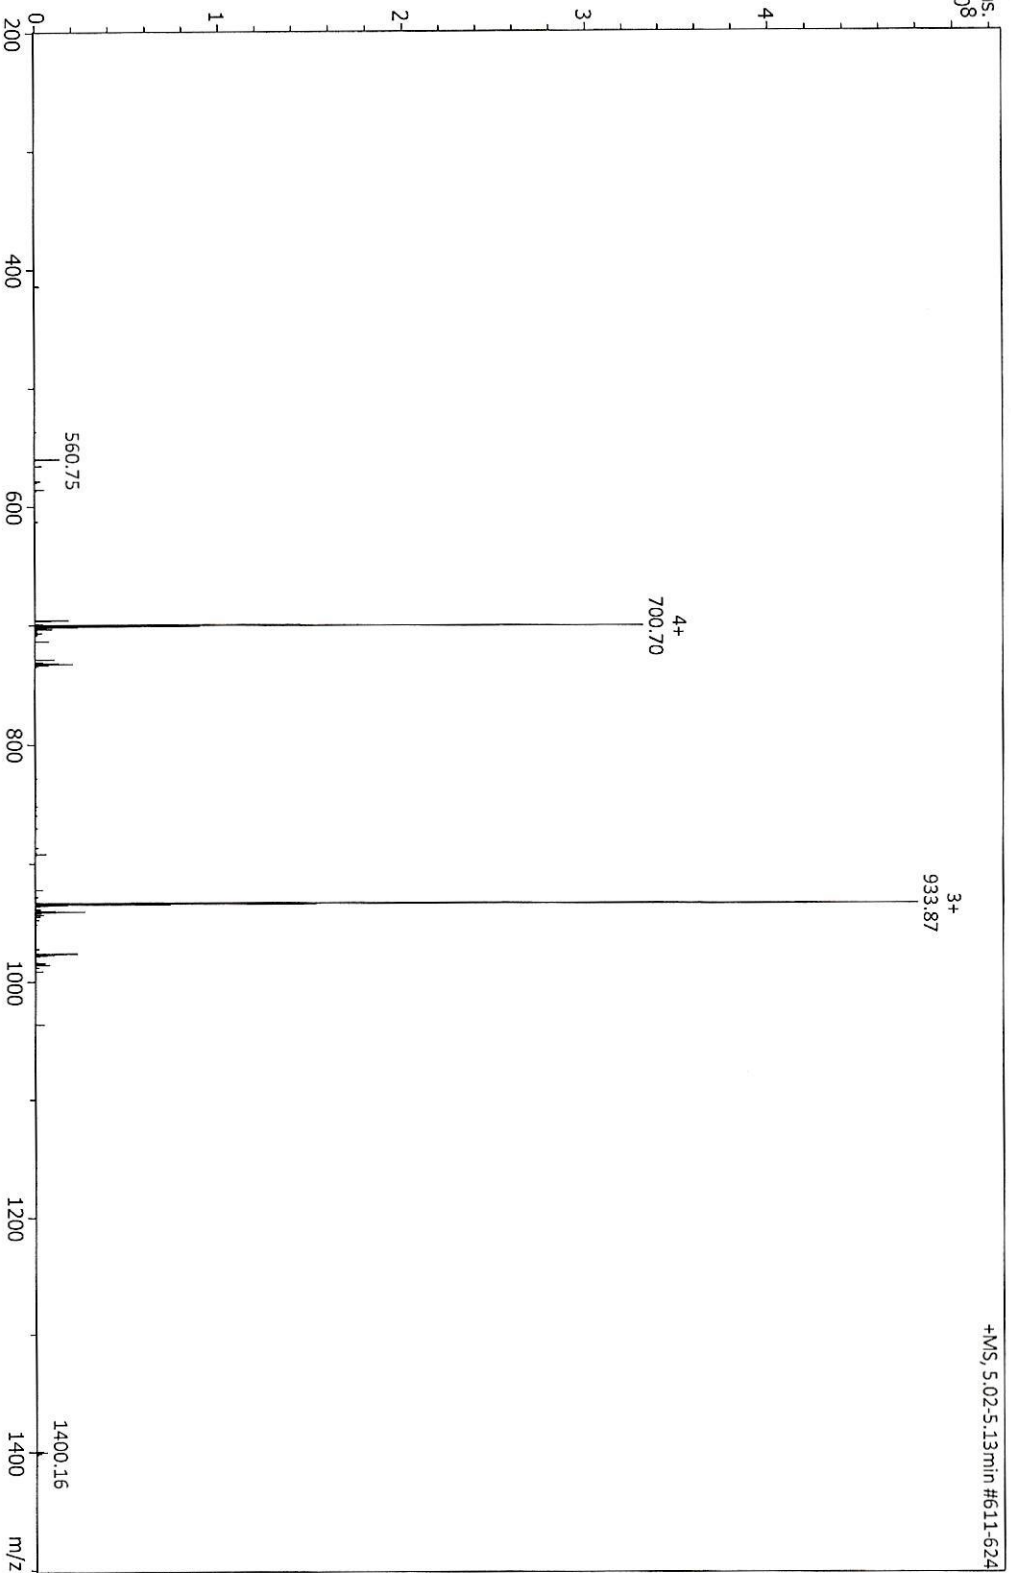

+MS, 5.02-5.13min #611-624

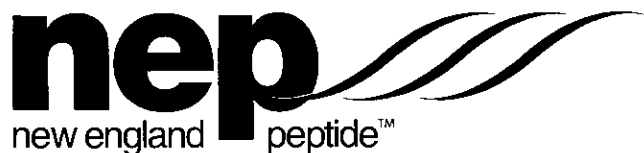

### Certificate of Analysis

|                                         |                  |                |
|-----------------------------------------|------------------|----------------|
| Sequence: H2N-EESKDAGIRTLVMLDEQGEQLD-OH |                  |                |
| Peptide Name:                           | Date: 12/11/2017 |                |
| Order#: P615100                         | Lot#: F2561      | Amount: 10.0mg |

**Quality Control Specifications:**

| QC Test                                       | QC Specifications                                                                 | Results |
|-----------------------------------------------|-----------------------------------------------------------------------------------|---------|
| Purity by HPLC                                | >95% by percent area                                                              | Pass    |
| Mass Identification by Mass Spectral Analysis | Calculated Mass within 0.1% of Molecular Weight: 2477                             | Pass    |
| Concentration/ Net Peptide                    | Amino Acid Analysis (AAA) determining original concentration/net peptide content. | N/A     |

**Product:** Research Grade Custom Peptide containing traces of Acetate salts.

**Formulation:**

Final concentration: N/A

Final form: Dry

**Stability and Conditions:** Refer to the Quality Control Detail Information on our website at [www.newenglandpeptide.com/support/quality-control-information](http://www.newenglandpeptide.com/support/quality-control-information). As always, NEP has individual batch records stored electronically for each peptide that includes traceable lot numbers of raw materials used during synthesis. Should you require this information, email [sales@newenglandpeptide.com](mailto:sales@newenglandpeptide.com) with your peptide lot number.

**Notes (if applicable):**

PD

Approval/Initials

*For Science... From Science.*

New England Peptide Inc., 65 Zub Lane, Gardner, MA 01440 ■ Phone 888-343-5974 ■ Fax 978-630-0021

[www.NewEnglandPeptide.com](http://www.NewEnglandPeptide.com)

**Peptide QC Report F2561 77-95**

Analysis Name D:\Data\F2561 77-95\_160310\_P1-E-3\_01\_80094.D  
 Sample Name F2561 77-95  
 Method APRIL20171.2ml.perMIN\_NEPO  
 A\_80094.m  
 Instrument amazon SL

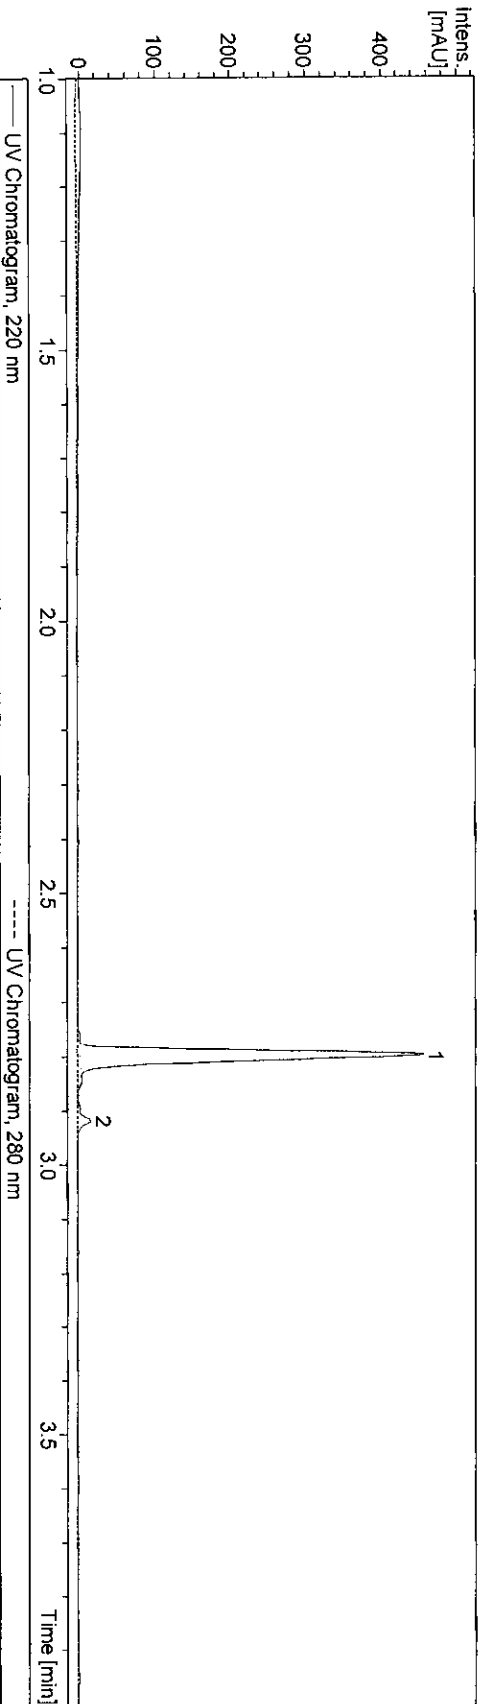

| # | RT [min] | Area    | Area Frac. % | Target Mass                       | Meas. Mass | Expct. Mass | Delt. Mr [Da] | Intensity | Area | Area Fraction [%] |
|---|----------|---------|--------------|-----------------------------------|------------|-------------|---------------|-----------|------|-------------------|
| 1 | 2.80     | 580.604 | 96.56        | Cmpd 1; 2.80 min; Pep Mr: 2476.41 | 2476.41    | 2477.00     | -0.59         | 454       | 581  | 96.6              |
| 2 | 2.92     | 20.703  | 3.44         |                                   |            |             |               |           |      |                   |

**Peptide QC Report F2561 77-95**

Cmpd 1; 2.80 min; Pep Mr: 2476.41

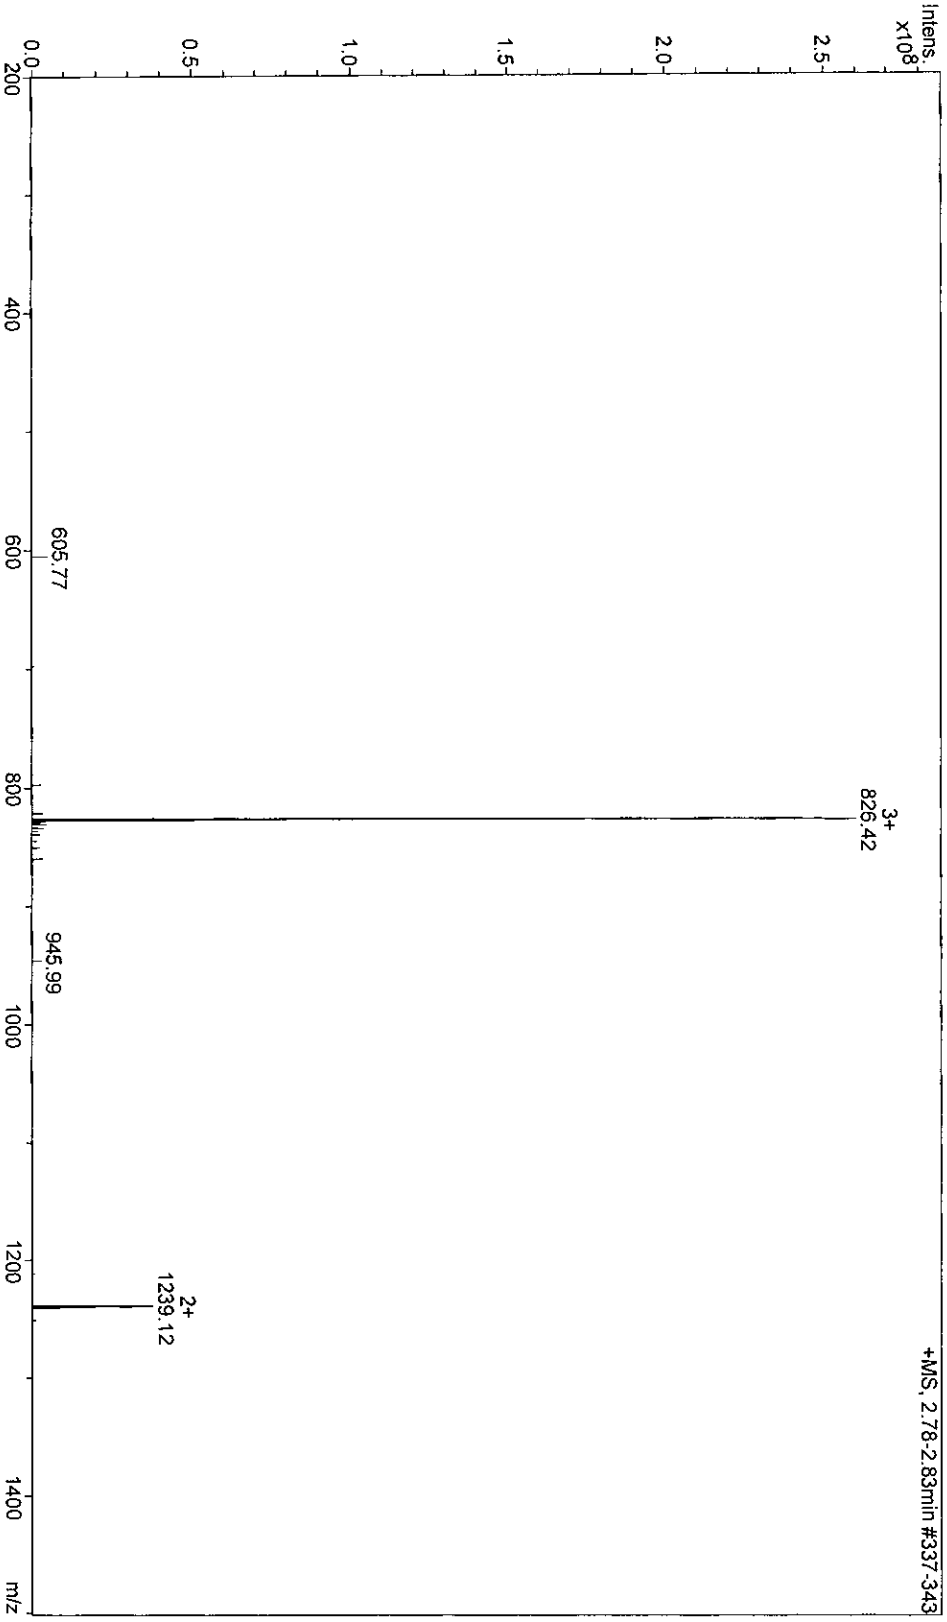

12/7/2017

Peptide QC Report



## Supplementary Figure 9

### NMR studies of SP9 (spectra are below)

NMR data were acquired on the peptide sample on a 600 MHz for H1 Varian Unity Inova NMR system with a 5 mm HCN room temperature probe. H1 1D, H1/C13 2D gHSQC, H1/C13 gHMBC, H1/H1 gCOSY, H1/H1 TOCSY with an 80 ms mixing time and H1/H1 ROESY with a 200 ms mixing time were acquired and analyzed with VNMRJ and MestreNova software.

The 1D data was integrated to analyze the number of downfield shifted H1 resonances, which would be only NH, NH<sub>2</sub>, and NH<sub>3</sub> resonances in this peptide. The gHSQC was used to disperse the resonances by C13 chemical shift. The  $\alpha$  H1 resonances can thus be counted as they are between 3.4 and 4.5 in H1 shift and 50 and 65 in C13 shift. The remainder of the side chain resonances are somewhat dispersed using gHSQC, but the overlap of those was insufficient to readily identify all of them.

Each amino acid has characteristic shifts for the side chain resonances as well as the  $\alpha$  H1 and C13. To determine which  $\alpha$  H1 and NH resonance belong to each amino acid the TOCSY and gCOSY were used to follow the NH to H $\alpha$  out the side chain. The TOCSY connects all H1 resonances in the same spin system; the gCOSY connects to only the H1 resonances on adjacent carbons. Each amino acid can be considered its own spin system, so starting with the NH, correlations are observed to the H $\alpha$ , H $\beta$ , H $\gamma$ , usually to the last H on that side chain. However, no correlations are observed to the next amino acid in the sequence. The amino acids with methyl groups- valine, leucine and isoleucine are easy to assign based upon the presence of the methyl in the TOCSY spectra. Each methyl also has characteristic C13 shift so separating each of those 3 amino acids is straight forward. Lysine and arginine are also readily assigned with the Nitrogen(s) at the end of each of their side chains. The Nitrogen shifts the last CH downfield in both C13 and H1. Also, the NH<sub>3</sub><sup>+</sup> of lysine is observed and correlates through TOCSY and gCOSY. Glutamine has observable NH<sub>2</sub> amide peaks on the end of its side chain making it different than glutamic acid. Aspartic acid and glutamic acid are only different by one carbon, so they are quite similar, but the chemical shifts for aspartate CH $\beta$  are slightly different than glutamate. Methionine was difficult due to overlap of its side chain with glutamate and aspartate except for the methyl. Correlations from the methyl in gHMBC which correlates H1 to C13 through multiple bonds and ROESY which correlates through-space connect it to a resonance at 2.34 ppm which connects to the assigned H $\alpha$ .

The resonances on the staple were identified by TOCSY starting with the alkene peaks at 5.3 ppm (H1)/130 ppm (C13). Ideally there would 4 separate resonances, but only 2 were observed. They can be assigned as the 2 on the same alkene so both staple alkene shifts are the same for the 2 staples. The remainder of the shifts can be observed with TOCSY and gCOSY but were not readily assigned due to overlap. However, the last carbon on the staple side chain can be observed and assigned. Each of the 4 of these is different in carbon shift as observed in gHMBC from a methyl group. This methyl also connects to 4 different carbonyls and 4 carbons with

shifts of about 60 ppm. The 60 ppm carbon is thus the quaternary carbon on the backbone of the peptide that starts the staple side chain. As it is connected to a nitrogen, it is shifted downfield in carbon shift. The carbonyl shift is the backbone amide carbonyl. Thus, the TOCSY connects the alkenes through the staple side chain. The gHMBC connects the methyl to the backbone carbonyl, quaternary carbon, and to the last carbon of the staple side chain.

The last assignments were assigning the NH peaks that are part of the staple. They can be observed in the H1 1D and are singlets, unlike all peptide amides which are doublets except for the side chain NHs which are readily distinguished and the C-terminal amide which is an NH<sub>2</sub>. As the staple NHs have no connections in H1/H1 through-bond experiments, the through-space ROESY was used to try to connect to other H1 resonances. Correlations are observed in the ROESY to the sequential NH resonances for all 4 NH staple peaks when there was enough resolution from the diagonal. As the 3 sequence specific glutamates and 2 aspartates could not be confidently assigned, a correlation to glutamate could be to any of the 3 in the sequence. The correlations observed are consistent with the structure as drawn.

### **Predicted molecular weight matches the observed molecular weight for SP9**

The predicted molecular weight of SP9 is 2217.6 (calculated from SP9.pdb using Pymol). The molecular weight of the synthesized SP9 as observed by LC/MS is 2222 (see Supplementary Figure 2). Thus, the observed molecular weight is within 0.1% to the predicted molecular weight. This agreement strongly argues that the synthesized SP9 has the correct sequence and that the two staples have formed correctly.

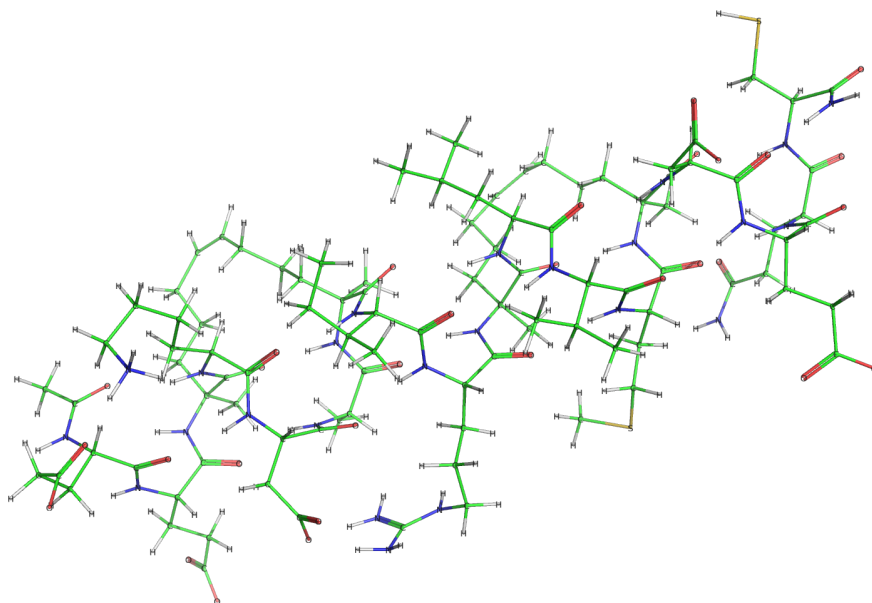

Image of a model of SP9 (the coordinates are available as source data SP9.pdb).

# H1 1D

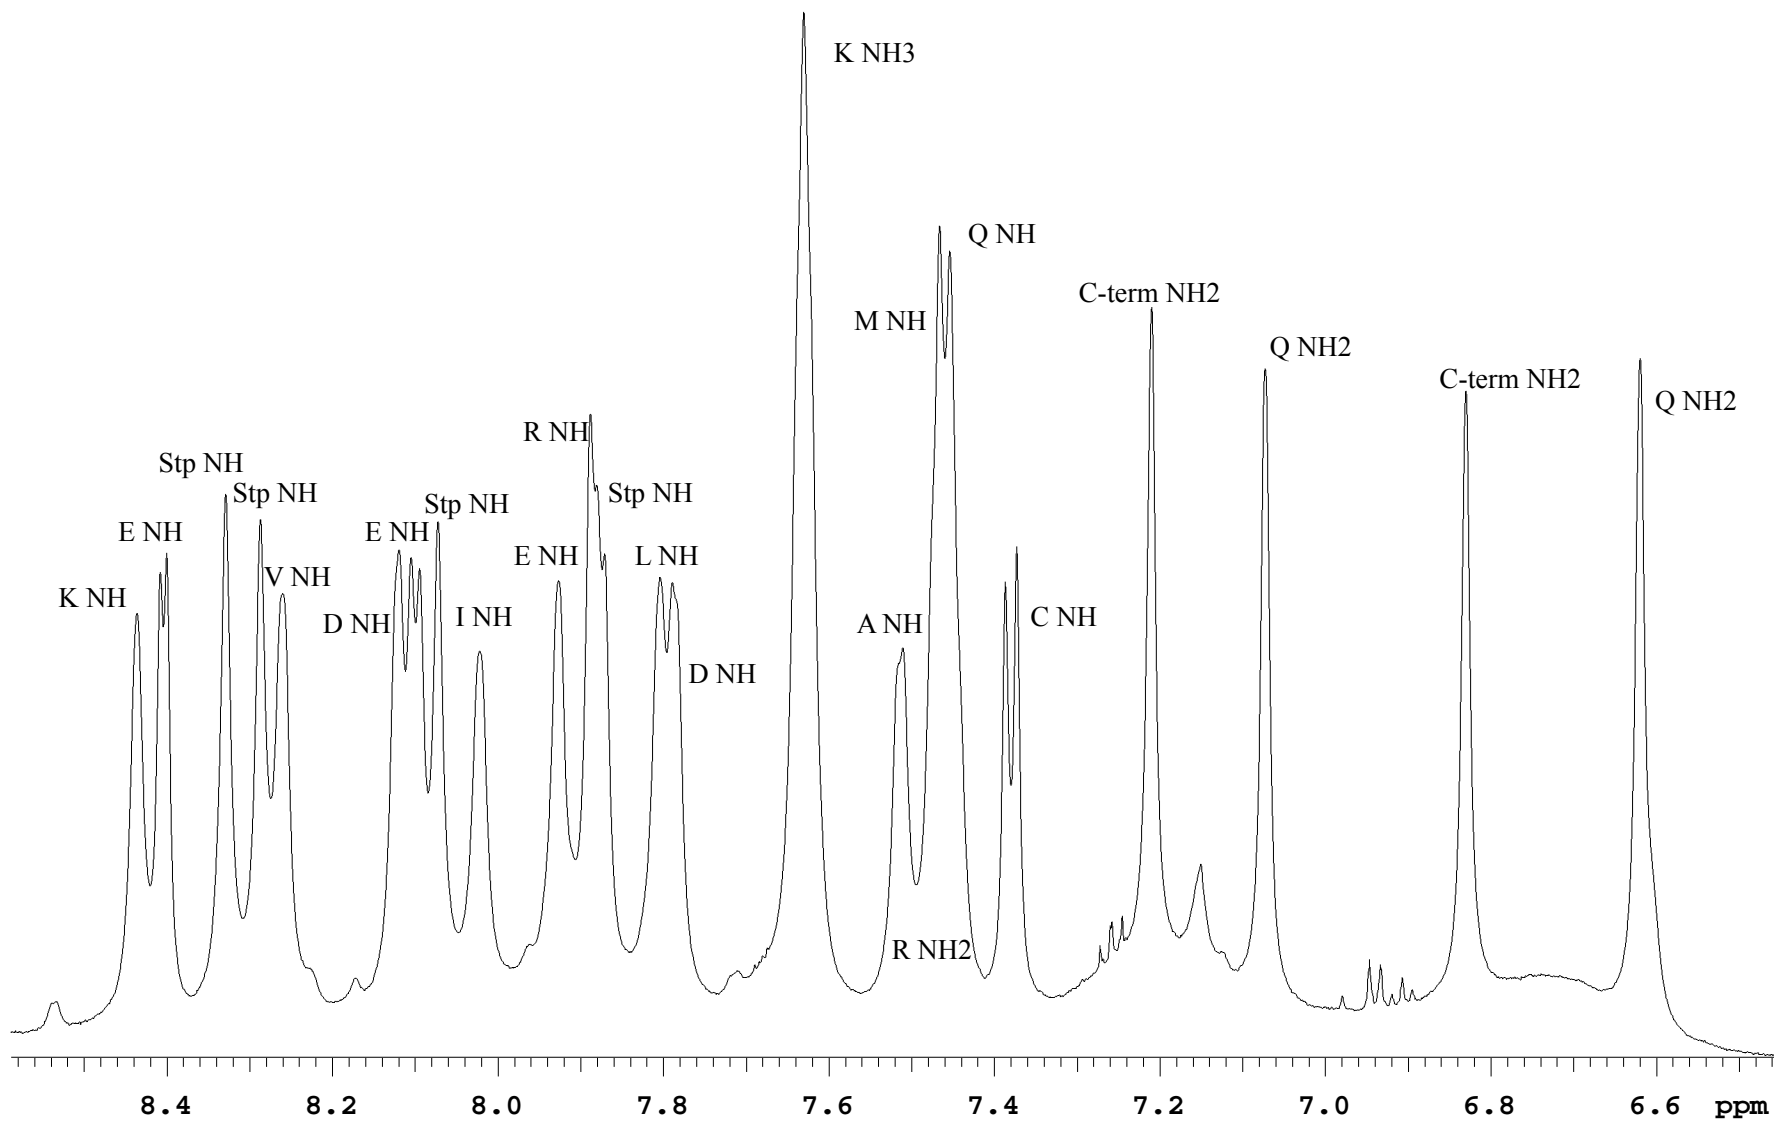

# H1-C13 HSQC

F1  
(ppm)

125  
126  
127  
128  
129  
130  
131  
132  
133  
134  
135

Staple CH alkene

Staple CH alkene

5.6

5.5

5.4

5.3

5.2

5.1

5.0

F2 (ppm)

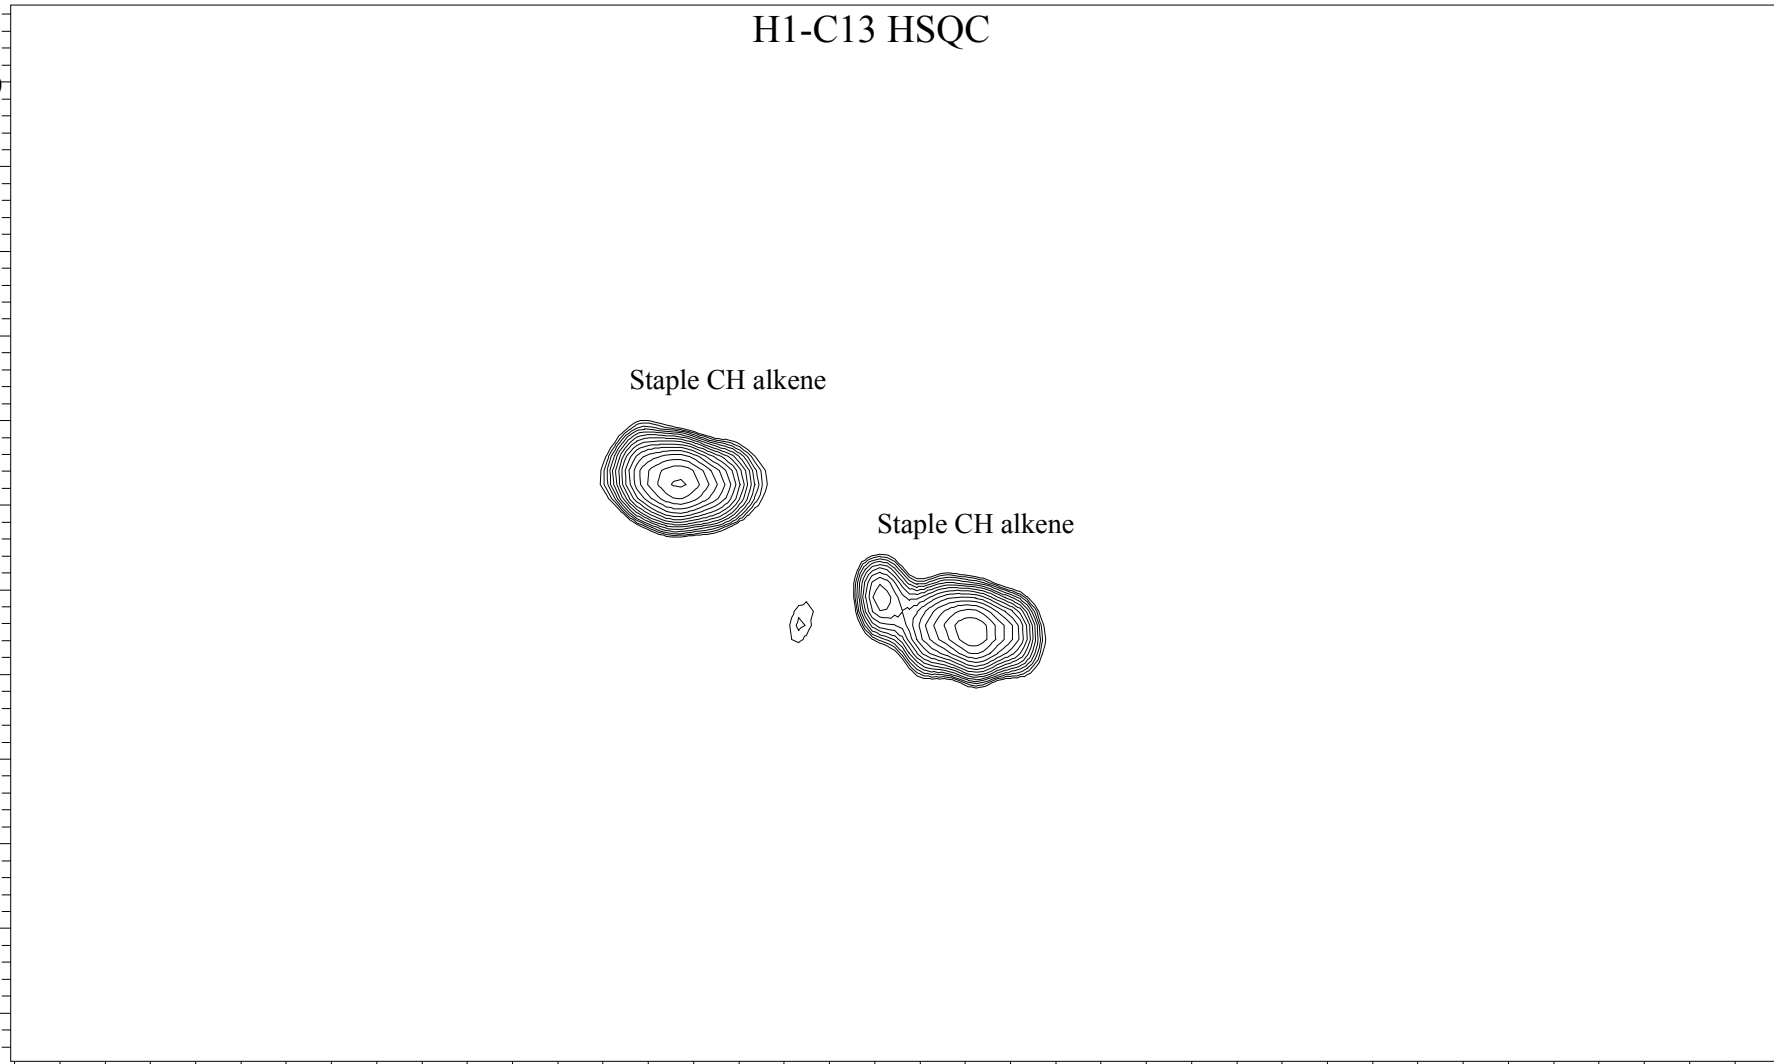

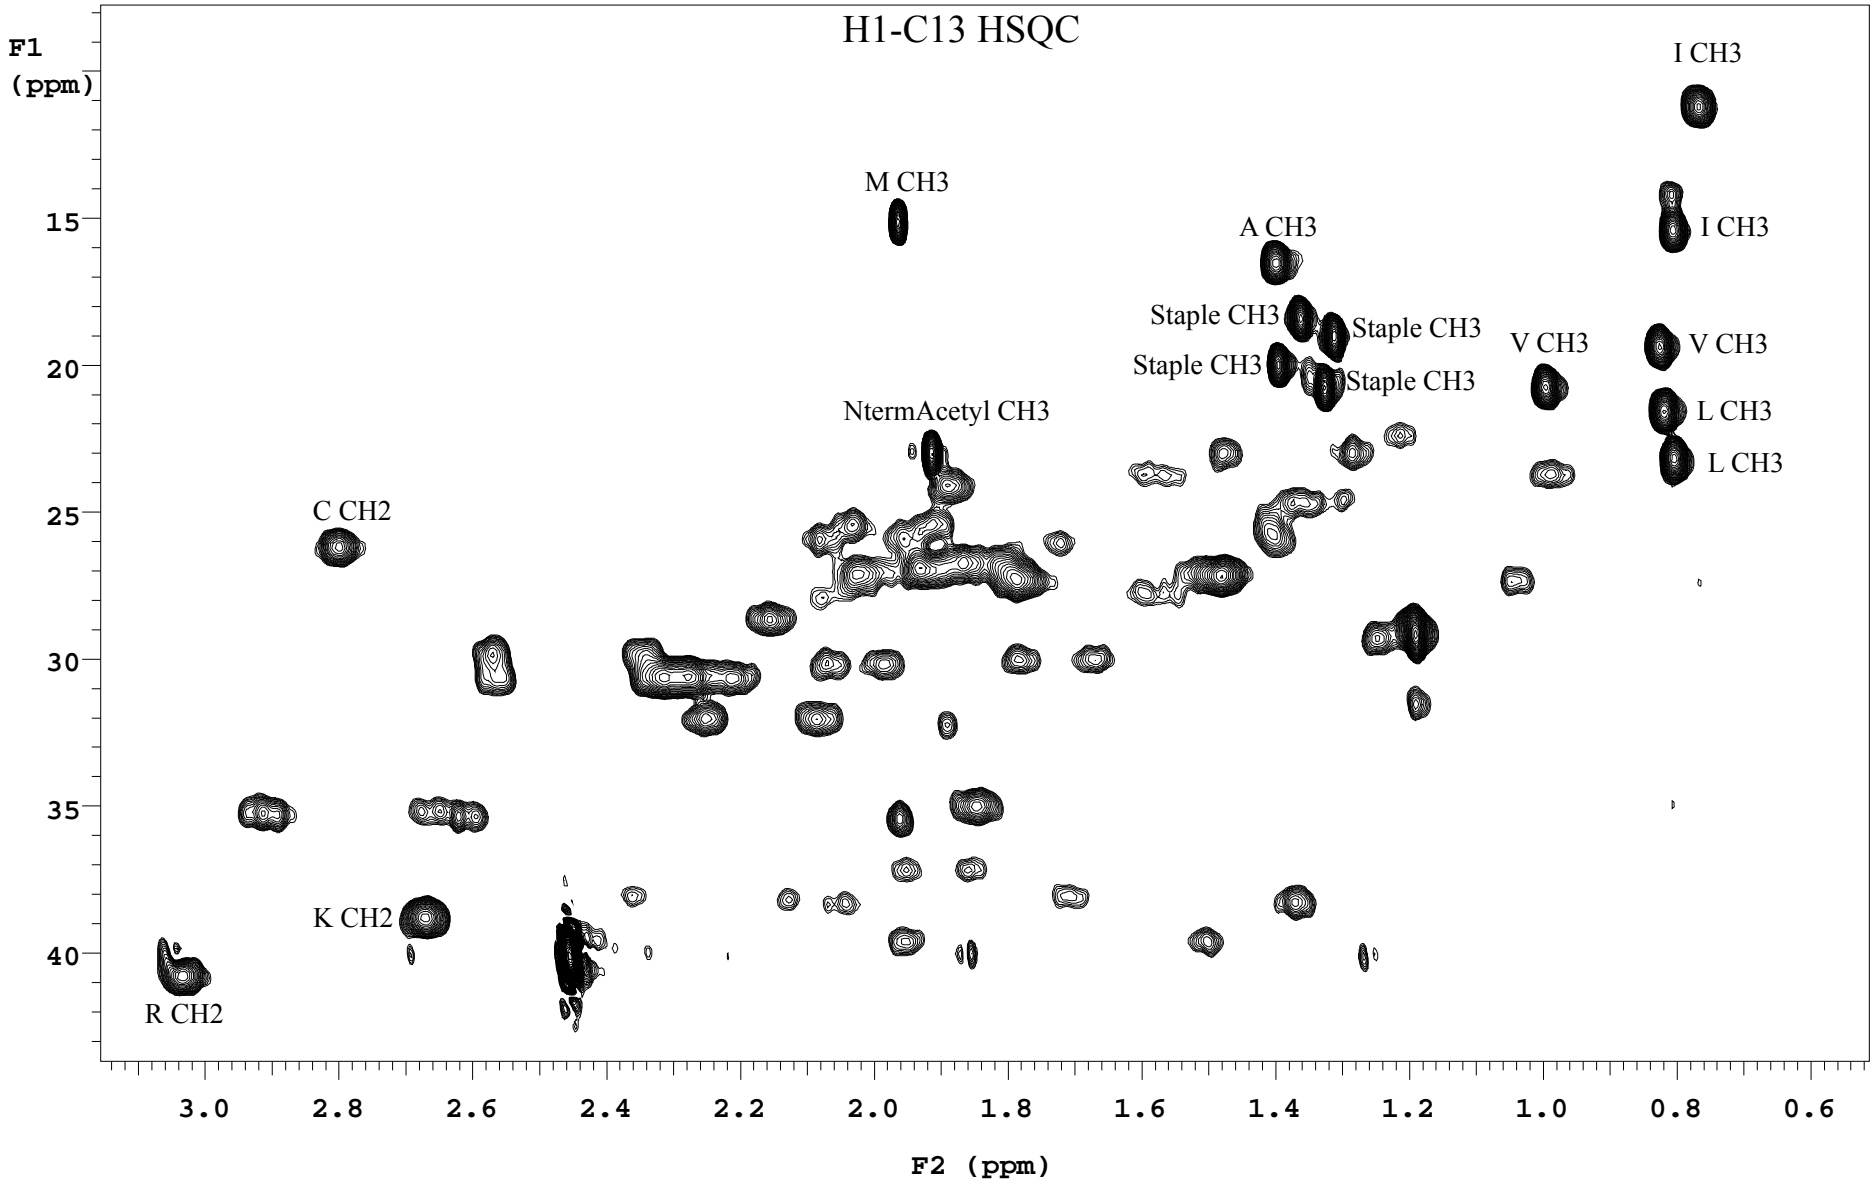

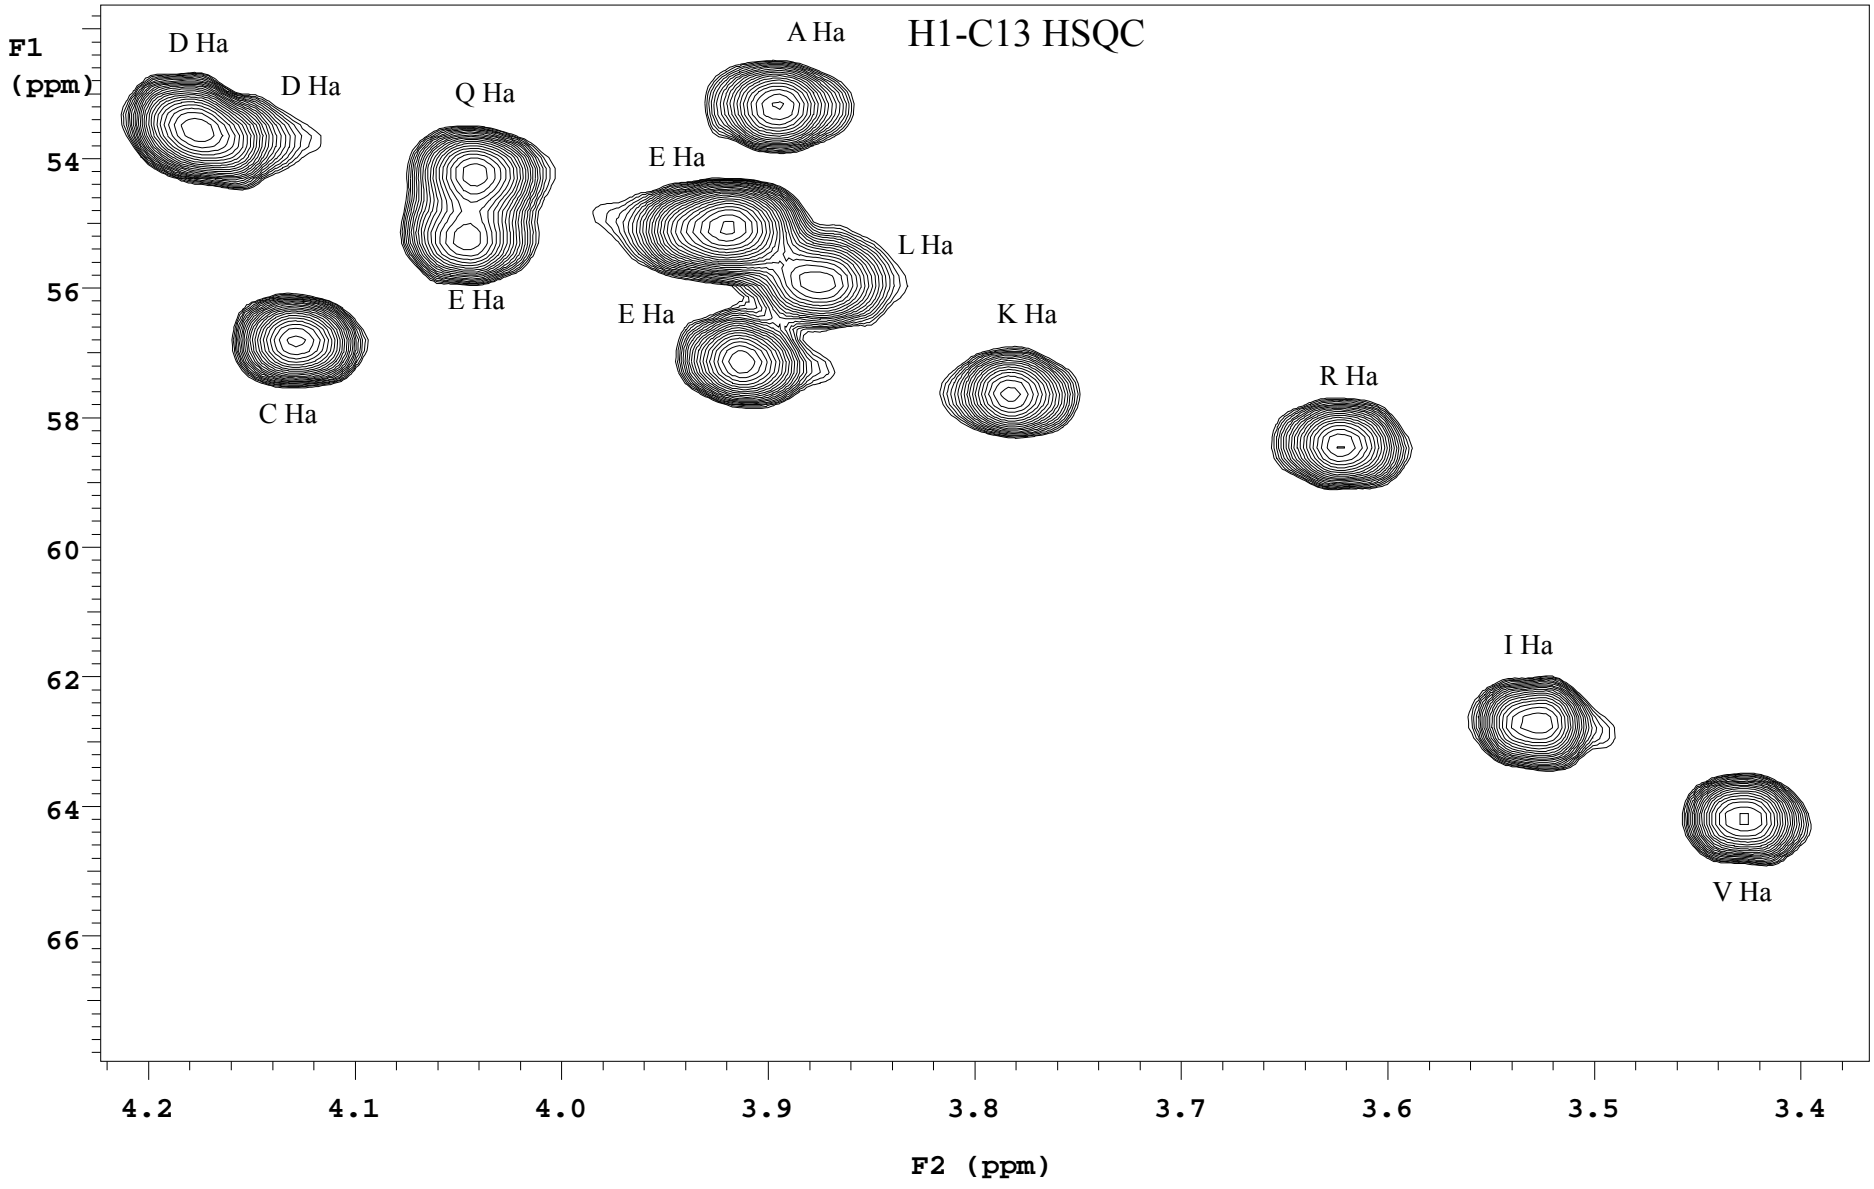

# H1-C13 HMBC

F1  
(ppm)

40

45

50

55

60

65

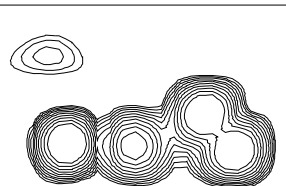

4 Staple CH2 carbon

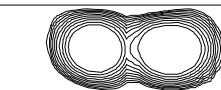

I CH3-Cb

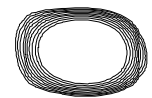

L CH3-Cb

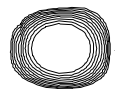

A CH3-Ca

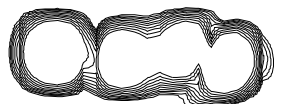

4 Staple CH3-quaternary Carbon

V CH3-Ca

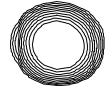

I CH3-Ca

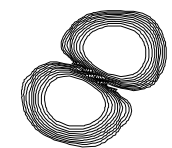

V CH3-Ca

1.4

1.3

1.2

1.1

1.0

0.9

0.8

0.7

F2 (ppm)

# H1-C13 HMBC

F1  
(ppm)

Staple CH2-Staple alkene

135

140

145

150

155

160

165

170

N-term acetyl CH3-carbonyl

175

M CH3-carbonyl

A CH3-carbonyl

Q CH3-carbonyl

4 Staple CH3-carbonyl

180

185

2.0

1.9

1.8

1.7

1.6

1.5

1.4

1.3

1.2

F2 (ppm)

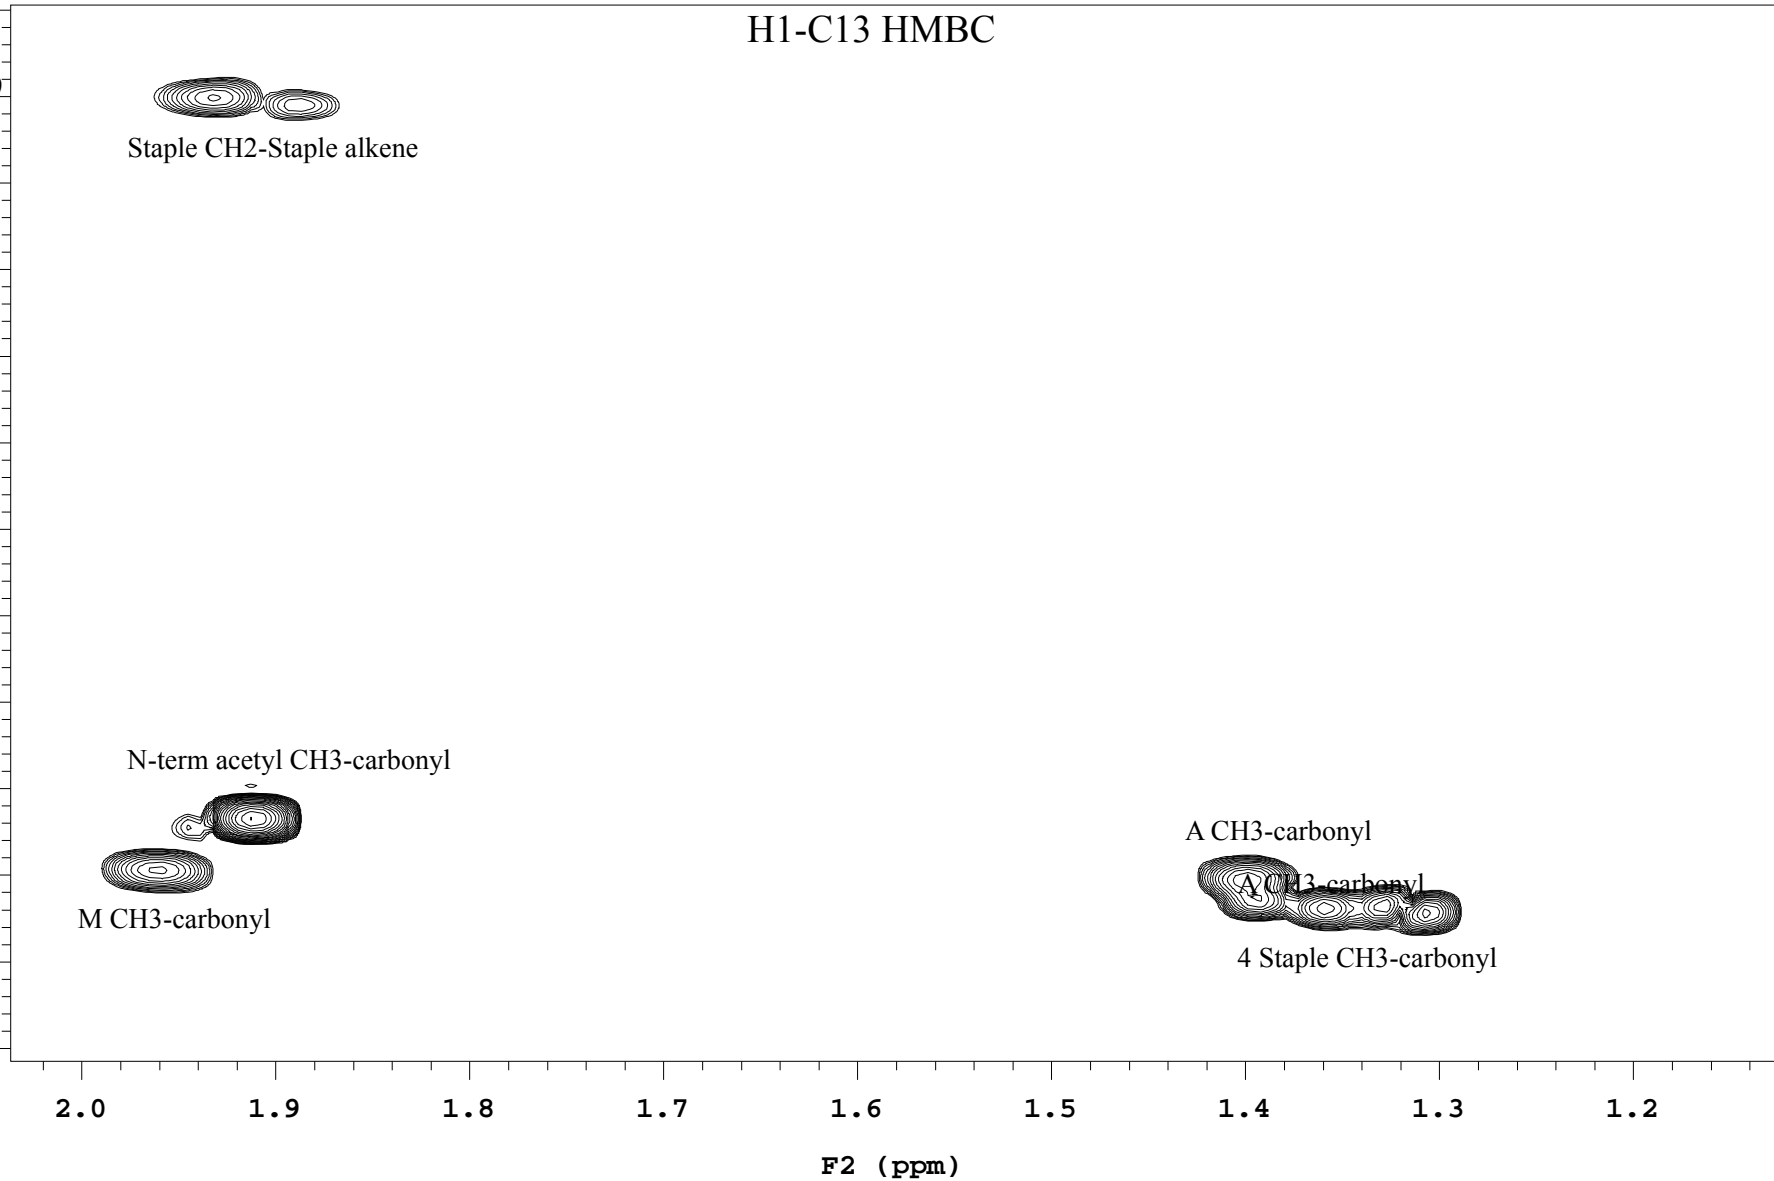

Supplement: 41586_2022_4543_MOESM1_ESM.pdf [file 41586_2022_4543_MOESM1_ESM.pdf]
